## **Feedback regulation of steady-state epithelial turnover and organ size**

Jackson Liang<sup>1</sup>, Shruthi Balachandra<sup>1</sup>, Sang Ngo<sup>1</sup>, Lucy Erin O'Brien<sup>1</sup>

### **Affiliation:**

<sup>1</sup>Department of Molecular and Cellular Physiology, Stanford University School of Medicine, Stanford, CA 94305.

1 **ABSTRACT**

2           Epithelial organs undergo steady-state turnover throughout adult life, with old cells being  
3 continually replaced by the progeny of stem cell divisions<sup>1</sup>. To avoid hyperplasia or atrophy, or-  
4 gan turnover demands strict equilibration of cell production and loss<sup>2-4</sup>. However, the mechanis-  
5 tic basis of this equilibrium is unknown. Using the adult *Drosophila* intestine<sup>5</sup>, we find that ro-  
6 bustly precise turnover arises through a coupling mechanism in which enterocyte apoptosis  
7 breaks feedback inhibition of stem cell divisions. Healthy enterocytes inhibit stem cell division  
8 through E-cadherin, which prevents secretion of mitogenic EGFs by repressing transcription of  
9 the EGF maturation factor *rhomboid*. Individual apoptotic enterocytes promote divisions by loss  
10 of E-cadherin, which releases cadherin-associated  $\beta$ -catenin/Armadillo and p120-catenin to in-  
11 duce *rhomboid*. Induction of *rhomboid* in the dying enterocyte triggers EGFR activation in stem  
12 cells within a discrete radius. When we block apoptosis, E-cadherin-controlled feedback sup-  
13 presses divisions, and the organ retains the same number of cells. When we disrupt feedback,  
14 apoptosis and divisions are uncoupled, and the organ develops either hyperplasia or atrophy. Al-  
15 together, our work demonstrates that robust cellular balance hinges on the obligate coupling of  
16 divisions to apoptosis, which limits the proliferative potential of a stem cell to the precise time  
17 and place that a replacement cell is needed. In this manner, localized cell-cell communication  
18 gives rise to tissue-level homeostatic equilibrium and constant organ size.

19

## 20 **MAIN TEXT**

21 Over an animal's lifetime, mature organs undergo repeated rounds of cell turnover yet are  
22 able to remain the same approximate size. This remarkable ability implies the existence of robust  
23 mechanisms to ensure that turnover is zero-sum, with precisely equal rates of cell production and  
24 loss<sup>1,2,10-12</sup>. In most organs, the production of new cells ultimately depends on the divisions of  
25 resident stem cells. Although much is understood about how excessive or insufficient divisions  
26 lead to disease, little is known about how equal rates of division and loss are sustained during the  
27 steady-state turnover of healthy tissues.

28 We investigated the regulation of turnover using the epithelium of the adult *Drosophila*  
29 midgut<sup>8,9</sup>. To establish whether production of new cells equals loss of old cells, we examined the  
30 kinetics of cell addition and loss using *escargot* flp-out (*esg<sup>F/O</sup>*) >*GFP* labeling (Fig. 1a-e, Ex-  
31 tended Data Fig. 1)<sup>13</sup>. Upon 29°C temperature shift, all undifferentiated midgut cells are labeled  
32 by permanent, heritable GFP expression. Mature cells that were present before induction remain  
33 unlabeled, while mature cells that arise after induction inherit GFP expression from their progen-  
34 itors. Focusing on the midgut's R4ab region (also known as P1-2; Extended Data Fig 1b-e)<sup>14,15</sup>,  
35 we found that total (DAPI<sup>+</sup>) cells remained near-constant over time, while the number of newly  
36 added, GFP<sup>+</sup> cells increased linearly (Fig 1e, Extended Data Fig 1g). At 4 days post-induction,  
37 virtually all cells in the R4ab region were GFP<sup>+</sup>, signifying that complete cell replacement had  
38 occurred. We conclude that production of new cells quantitatively equals loss of old cells.

39 Most cells in the midgut epithelium are polyploid enterocytes<sup>16</sup>. Each enterocyte is the  
40 product of one asymmetric stem cell division; the enterocyte lineage contains no transit-  
41 amplifying cells (Extended Data Fig. 1a)<sup>9</sup>. To probe the relationship between cell production  
42 and loss, we devised a system to manipulate enterocytes and perform concomitant lineage tracing  
43 of stem cells by combining enterocyte-specific *mexGAL4; GAL80<sup>ts</sup>* (*mex<sup>ts</sup>*)<sup>17,18</sup> with the clonal  
44 labeling system split-*nlsLacZ*<sup>6,9,19-21</sup> (Fig 1f; Extended Data Fig. 2). This two-pronged system  
45 was tested by de-repressing *mex<sup>ts</sup>* >*his2av::RFP* with 29°C temperature shift and then inducing

46 mitotic recombination and  $\beta$ -galactosidase expression in stem cells via a brief 38.5°C heat shock.  
47 As expected, His::RFP marked all enterocytes (polyploid cells), both within and outside of  $\beta$ -  
48 galactosidase-marked stem cell clones, but did not mark non-enterocyte, diploid cells (Fig 1g).

49 Using this two-pronged system, we blocked enterocyte apoptosis and assessed the impact  
50 on stem cell divisions. Expression of the potent apoptotic inhibitor *p35* in enterocytes  
51 (*mex<sup>ts</sup>>p35*) resulted in fewer stem cell divisions, as indicated by smaller clone sizes (Fig 1h-j).  
52 Slowing down stem cell divisions could be a compensatory strategy to preserve overall cell  
53 number. Indeed, total cell numbers remained constant when apoptosis was blocked by *p35* or by  
54 the native caspase inhibitor Diap1 (Fig 1k) after four days. The physical dimensions of apopto-  
55 sis-inhibited midguts were similar to control guts (Extended Data Fig 3a), and epithelial tissue  
56 architecture remained intact (Extended Data Fig 4a-b, d-e). These results are supported by a prior  
57 report that fewer midgut cells incorporate BrdU in animals with impaired caspase activation<sup>22</sup>.  
58 Altogether, these findings imply that enterocyte apoptosis regulates the rate of stem cell divisions  
59 to homeostatically maintain constant cell number and organ size.

60 How is enterocyte apoptosis coupled to stem cell divisions? The epithelial cell-cell adhe-  
61 sion protein E-cadherin (E-cad, also known as *shotgun*) drew our attention because it is a poten-  
62 tial link between apoptosis, proliferation, and tissue homeostasis: First, E-cad undergoes targeted  
63 degradation by effector caspases in apoptotic epithelial cells<sup>23-26</sup>. Second, loss of E-cad drives  
64 proliferation of epithelial tumors<sup>27</sup>, and, in mouse intestine, targeted loss of enterocyte cadherin  
65 results in activated proliferation of progenitor cells<sup>28</sup>. Third, the E-cad adhesion complex is an  
66 upstream regulator of density-dependent contact inhibition in cultured epithelial cells<sup>29-31</sup>.

67 To assess whether E-cad is involved in coupling divisions to apoptosis, we first examined  
68 whether E-cad is downregulated in dying enterocytes. An E-cad::mTomato fusion<sup>32</sup> strongly de-  
69 lined cell-cell interfaces between healthy enterocytes (Fig. 2a). In contrast, E-cad::mTomato  
70 was largely absent from cell-cell interfaces between dying enterocytes, which were identified by

71 Sytox<sup>33</sup>. Altogether, these findings imply that dying enterocytes lose cell-surface E-cad, akin to  
72 apoptotic cells in other epithelia<sup>23-26</sup>.

73 To investigate the functional role of E-cad downregulation, we depleted *E-cad* in apopto-  
74 sis-blocked enterocytes and measured stem cell divisions (Fig. 2b-e). In contrast to apoptotic in-  
75 hibition alone (*mex<sup>ts</sup>>p35*), stem cells did not slow their divisions when *E-cad* was additionally  
76 knocked down (*mex<sup>ts</sup>>p35, E-cadRNAi*). At the same time, total cell number increased by 70%,  
77 resulting in enlarged, hyperplastic organs (Fig. 2h-j, Extended Data Fig 3a). These effects are  
78 *E-cad*-specific because depletion of another midgut cell-cell adhesion protein, *echinoid*, did not  
79 affect cell number (Fig. 2h). *E-cad* depletion alone (*mex<sup>ts</sup>>E-cadRNAi*) induced excess divisions  
80 but not organ hyperplasia, likely because of other, tissue-level effects (Fig. 2b, g; Extended Data  
81 Fig 5). *E-cad* overexpression suppressed divisions (Fig. 2b, f). Importantly, *E-cad* depletion did  
82 not disrupt the overall architecture or polarity of the midgut epithelium (Extended Data Fig. 4a,  
83 c-d, f), consistent with *E-cad* loss-of-function in the embryonic midgut<sup>34</sup>; nor did it compromise  
84 the intestinal barrier, likely because septate junctions are intact (Extended Data Fig 4g-j). Thus,  
85 enterocyte E-cad suppresses stem cell divisions during apoptotic inhibition for homeostatic con-  
86 trol of cell number.

87 E-cad mediates cell-cell adhesion by forming intercellular homodimers. We thus consid-  
88 ered whether enterocyte E-cad acts by dimerizing with stem cell E-cad<sup>35,36</sup>. To separately test  
89 the requirement for E-cad on progenitors, we built a system similar to Fig. 1f that combines ge-  
90 netic manipulation of stem and enteroblast cells (*esgGAL4;GAL80<sup>ts</sup>*, or *esg<sup>ts</sup>*) with split-*lacZ* lin-  
91 eage tracing of stem cells. Consistent with a prior report of 3-day *E-cad* null clones<sup>36</sup>, we found  
92 that neither depletion nor overexpression of *E-cad* altered the rate of stem cell divisions in 4-day  
93 clones (Fig. 2k). These data suggest that enterocyte E-cad acts not in conjunction with stem cell  
94 E-cad, but rather via a distinct intermediary.

95 Prime candidates for this intermediary signal include Wingless/Wnt, Hippo, cytokine-  
96 JAK-STAT, and EGFR. These pathways act downstream of E-cadherin in other tissues<sup>30,37-42</sup>  
97 and are key mediators of injury-activated proliferation in the midgut<sup>43-45</sup>. To assess whether the-  
98 se pathways are downstream of enterocyte E-cad, we examined whether *E-cad* depletion resulted  
99 in pathway activation. Known target mRNAs for Wingless and Hippo were not elevated in *E-cad*  
100 knockdown midguts compared to controls (Extended Data Fig. 6a). The cytokines *unpaired1-3*  
101 (*upd1-3*), which—particularly *upd3*—acutely respond to midgut injury<sup>46-49</sup>, were not elevated  
102 (Extended Data Fig. 6a-d). Activation of downstream STAT targets in progenitors was also unaf-  
103 fected (Extended Data Fig. 6a, e-g). By contrast, EGFR target mRNAs were significantly elevat-  
104 ed (Extended Data Fig. 6a, h-j).

105 To visualize EGFR activation, we immunostained midguts for the activated, diphosphor-  
106 ylated form of the EGFR effector ERK (dpERK) (Fig. 3a-f, Extended Data Fig. 3b). ERK activa-  
107 tion occurred predominantly in stem cells (Fig. 3f), consistent with prior reports from oth-  
108 ers<sup>44,46,50-54</sup>. We found that ERK-activated stem cells were infrequent during normal turnover,  
109 became abundant when *E-cad* was depleted from enterocytes, and virtually disappeared when  
110 *E-cad* was overexpressed (Fig. 3a-c, Extended Data Fig. 3b). Other studies have reported that  
111 ERK activation in the midgut is predominantly due to activation of EGFR<sup>13,44,46,51-53</sup>. Indeed,  
112 pharmacological EGFR inhibition (AG1478) or a conditional lethal heteroallele (*egfr<sup>tsla</sup>/egfr<sup>f24</sup>*)  
113 eliminated the dpERK signal in *E-cad* knockdown midguts (Fig. 3d-e, Extended Data Fig. 3b).  
114 Critically, EGFR signaling was required for excess stem cell divisions and organ hyperplasia  
115 caused by loss of *E-cad* in apoptosis-blocked enterocytes (Fig. 3g-h; Extended Data Fig. 3a).  
116 Thus, enterocyte E-cad inhibits stem cell EGFR signaling, and this inhibition mediates homeo-  
117 static control of cell number and organ size.

118 How does E-cad on enterocytes control EGFR activation in stem cells? Physical binding  
119 of E-cad and EGFR is one possible mechanism<sup>23-26,55,56</sup>; dispersal of secreted signals is another

120 <sup>57,58</sup>. To shed light on these possibilities, we used MARCM <sup>59</sup> to generate single, GFP-marked  
121 enterocytes that were depleted of *E-cad*. We measured the spatial range of EGFR activation sur-  
122 rounding the marked enterocyte (Fig 3i). ERK-activated cells frequently appeared in the vicinity  
123 of, but did not necessarily contact, single *E-cad* knockdown enterocytes, supporting the existence  
124 of a dispersed signal. Strong EGFR activation occurred within a radius of ~25  $\mu\text{m}$  from the edge  
125 of *E-cad* knockdown enterocytes, while weaker activation occurred up to ~50  $\mu\text{m}$  (Fig. 3j-l).  
126 These findings suggest that EGFR activation involves a dispersed signal that acts in a localized  
127 zone around the enterocyte.

128         Is this dispersed, E-cad-controlled signal an EGF ligand? Supporting this notion, we  
129 found that the two enterocyte-derived EGFs, *spitz* (*spi*) and *keren* (*krn*) <sup>46,51,52</sup>, were necessary for  
130 organ hyperplasia caused by loss of *E-cad* in apoptosis-blocked enterocytes (Figure 3h, Extended  
131 Data Fig. 3a). However, depletion of enterocyte *E-cad* surprisingly did not alter mRNA levels of  
132 either *spi* or *krn* (Fig. 4a). Furthermore, mRNA levels were unchanged for the visceral muscle-  
133 derived EGF *vein* <sup>46,51,52</sup>, the EGF chaperone *star*, the secreted EGF inhibitor *argos*, and *egfr* it-  
134 self. Strikingly by contrast, levels of the obligate EGF protease *rhomboid* (*rho*) increased sub-  
135 stantially with *E-cad* knockdown and decreased with *E-cad* overexpression (Fig. 4a).

136         During EGF biosynthesis, Rho cleaves inactive, membrane-tethered EGF peptides into  
137 active, soluble forms <sup>60,61</sup>. This function raises the possibility that E-cad controls EGF signaling  
138 by controlling EGF processing through Rho. Consistent with this possibility, we found that ex-  
139 pression of *rho-lacZ* in enterocytes, but not diploid progenitor cells, was activated by *E-cad*  
140 knockdown and inhibited by *E-cad* overexpression (Extended Data Fig. 7c-d, f). Thus, E-cad  
141 suppresses transcription of *rho* specifically in enterocytes.

142         We tested whether levels of enterocyte *rho* determine levels of stem cell EGFR activation.  
143 Overexpression of *rho* in enterocytes promoted activation of ERK and increased numbers of mi-  
144 totic stem cells (Extended Data Fig. 3b, Extended Data Fig. 7m-n,s). Conversely, depletion of

145 *rho* abrogated activation of ERK (Extended Data Fig. 3b, Extended Data Fig. 7o). Furthermore,  
146 combined depletion of *rho* and *E-cad* together precluded the hyperactivation of ERK caused by  
147 depletion of *E-cad* alone (Fig. 4b-c, Extended Data Fig. 3b). Altogether, these results show that  
148 enterocyte E-cad inhibits stem cell EGFR by repressing enterocyte *rho*.

149 Is this E-cad-Rho-EGFR relay responsible for coupling stem cell divisions to enterocyte  
150 apoptosis? If so, then: (1) apoptotic enterocytes, which lose E-cad (Fig. 2a), should concomitant-  
151 ly upregulate *rho*; (2) loss of E-cad in apoptotic enterocytes should underlie stem cell EGFR ac-  
152 tivation; and (3) exogenous manipulation of *rho* should disrupt cellular equilibrium and alter or-  
153 gan size. We investigated each of these predictions. First, we examined the expression pattern of  
154 *rho* during normal midgut turnover. Strikingly, the *rho-lacZ* reporter predominantly marked  
155 apoptotic enterocytes and rarely marked non-apoptotic enterocytes (Fig. 4d-f). Thus, enterocytes  
156 repress *rho* when healthy but activate *rho* upon physiological apoptosis.

157 Prior studies have shown that *rho* is upregulated upon tissue-wide injury or pan-  
158 enterocyte death<sup>46,52</sup>. Given this precedent, we wondered whether other injury signals are acti-  
159 vated upon physiological apoptosis. However, the cardinal injury signal *upd3* was rarely ob-  
160 served in apoptotic enterocytes (Extended Data Fig. 6k). Furthermore, *upd3* was dispensible for  
161 stem cell ERK hyperactivation in *E-cad* knockdown enterocytes (Extended Data Fig. 3b, Ex-  
162 tended Data Fig. 7i). These contrasts between *upd3* and *rho* indicate that dying cells signal dif-  
163 ferently in injury and steady-state contexts, possibly due to loss of the intestinal barrier or ineffi-  
164 cient clearance of cell corpses following extensive damage.

165 To test the second prediction, we blocked enterocyte apoptosis (*mex<sup>ts</sup>>p35*) and exam-  
166 ined stem cell EGFR activation. ERK-activated stem cells were virtually absent following apop-  
167 totic inhibition but were restored by the additional depletion of enterocyte *E-cad* (*mex<sup>ts</sup>>p35*,  
168 *E-cadRNAi*) in a *rho*-dependent manner (*mex<sup>ts</sup>>p35*, *E-cadRNAi*, *rhoRNAi*) (Fig. 4g-j, Extended



169 Data Fig. 3b). These results demonstrate that loss of E-cad in apoptotic enterocytes is responsible  
170 for EGFR activation in stem cells.

171 To examine the third prediction, we manipulated *rho* in enterocytes and measured total  
172 cell number and organ size. Overexpression of *rho* in apoptosis-inhibited enterocytes (*mex<sup>ts</sup>>p35*,  
173 *rho*) resulted in organ hyperplasia, with cell number increased by 100% (Fig 4k, Extended Data  
174 Fig. 3a). Conversely, loss of *rho* in apoptosis-competent enterocytes (*mex<sup>ts</sup>>rhoRNAi*) resulted in  
175 organ atrophy, with cell number reduced by ~60% (Extended Data Fig. 8). This requirement for  
176 Rho during steady-state turnover contrasts with prior findings that Rho is dispensible for injury  
177 repair<sup>46</sup>, drawing further distinction between turnover and repair mechanisms. Moreover, com-  
178 bined loss of both *rho* and *E-cad* in apoptosis-inhibited enterocytes (*mex<sup>ts</sup>>p35,E-cadRNAi*,  
179 *rhoRNAi*) thwarted the hyperplasia that would have resulted from loss of *E-cad* alone, and nor-  
180 mal cell number was preserved (Fig. 4k, Extended Data Fig. 3a). Altogether, these results show  
181 that downstream of E-cad, *rho* is the pivot point that balances division and death to maintain  
182 constant organ size.

183 Finally, how does E-cad, a transmembrane adhesion receptor, control expression of *rho*  
184 in the nucleus? To address this question, we examined three factors whose ability to activate nu-  
185 clear transcription is precluded by sequestration at E-cad-containing adherens junctions:  
186  $\beta$ -catenin/Armadillo (Arm), p120-catenin (p120, also known as p120ctn), and YAP/Yorkie (Yki)  
187 <sup>38,62-68</sup>. We found that *arm* and *p120*, but not *yki*, were required in *E-cad* knockdown enterocytes  
188 for both induction of *rho* and hyperactivation of stem cell EGFR (Extended Data Fig. 7a, g-l).  
189 Overexpression of *p120*, but not constitutively active *arm<sup>S10</sup>*, was sufficient for induction of *rho*  
190 (Extended Data Fig. 7b-f) and hyperactivation of EGFR (Extended Data Fig. 3b, Extended Data  
191 Fig. 7p-r). Overexpression of the transcriptional co-repressor Groucho, which can dimerize with  
192  $\beta$ -catenin/Arm to repress *rho* in some tissues<sup>69-71</sup>, did not inhibit induction of *rho* in enterocytes

193 (Extended Data Fig. 7a). Overexpression of the JNK inhibitor *puckered* partially inhibited *rho*  
194 induction, although the statistical significance of this effect was unclear (Extended Data Fig. 7a).

195 We next asked whether Arm, p120, or both affect organ size. Enterocyte knockdown of  
196 either *arm* or *p120* blocked the hyperplasia that otherwise would have occurred upon loss of  
197 *E-cad* and apoptotic inhibition; knockdown of both factors had a quantitatively similar effect  
198 (Fig 4k, Extended Data Fig. 3a). In addition, overexpression of *p120*, but not *arm*<sup>S10</sup>, was suffi-  
199 cient to induce hyperplasia, and overexpression of both factors exacerbated the effect (Fig. 4k,  
200 Extended Data Fig 3a). Conversely, depletion of either *arm* or *p120* produced mild atrophy (Ex-  
201 tended Data Figure 8). These data show that the p120 and Arm transcription factors underlie E-  
202 cad-controlled expression of *rho* and suggest that E-cad represses *rho* by sequestering p120 and  
203 Arm to control organ size.

204 Altogether, our results demonstrate that steady-state organ turnover is not driven by the  
205 constitutive cycling of stem cells. Instead, healthy enterocytes keep stem cells in a default state  
206 of quiescence, while the sporadic appearance of apoptotic enterocytes triggers replacement divi-  
207 sions. Precise cellular balance hinges upon the E-cad-dependent repression of *rho* in healthy en-  
208 terocytes, which is disrupted when E-cad is lost in apoptotic enterocytes (Fig 4l). Because divi-  
209 sions are coupled to apoptosis, turnover remains zero-sum over time.

210 The direct coupling of divisions to apoptosis suggests a simple explanation for how the  
211 midgut epithelium dynamically maintains a constant number of cells with such robust precision.  
212 Crucially, a single midgut enterocyte can efficiently activate EGFR in stem cells within a ~25  
213  $\mu\text{m}$  radius (Fig. 3j-l). We suggest that this zone of activation, which exists only for as long as the  
214 dying cell remains in the epithelium, may be critical for homeostatic size control. If, by chance,  
215 stem cells produce too many enterocytes, then the stem cells' physical spacing would increase;  
216 subsequently, fewer stem cells would be within the activation zone of the next dying enterocyte,  
217 and fewer divisions would result. Similarly, too few enterocytes would place more stem cells in

218 the activation zone, and more divisions would result. By setting the steady-state number of en-  
219 terocytes, the integration of these activation zones over the entire epithelium would determine  
220 overall organ size. In this manner, localized cell-cell communication can give rise to tissue-level  
221 homeostatic equilibrium.

222 Our study brings to light a basic distinction in how EGFs are deployed during steady-  
223 state turnover versus injury repair. At steady-state, apoptotic induction of *rho* is strictly cell au-  
224 tonomous because E-cad-dependent activation of p120 and Arm is confined to the dying entero-  
225 cyte. This cell autonomous pathway limits the release of EGFs to the precise time and place that  
226 a new cell is needed, as appropriate for zero-sum replacement. By contrast during injury, induc-  
227 tion of *rho* and EGFs involves an additional, non-cell autonomous pathway in which damaged  
228 enterocytes upregulate *upd3*; Upd3 in turn activates enteroblasts and visceral muscle to upregu-  
229 late *rho* and EGFs<sup>46,48,49,52</sup>. This non-autonomous pathway permits EGFs to be released in a  
230 widespread, indiscriminate manner, as appropriate for an emergency response. Underscoring this  
231 distinction, enterocyte *upd3* is required for repair<sup>13,46,48,49</sup> but not homeostasis (Extended Data  
232 Figs. 6a-d, k and 7i), whereas enterocyte *rho* is required for homeostasis (Fig 4) but not repair<sup>46</sup>.

233 Stem cell EGFR signaling is known to affect homeostasis of other tissues<sup>72-74</sup>, raising the  
234 possibility that spatially specific control of EGFR activation by E-cad and Rho is a general  
235 mechanism for cellular equilibrium. By extension, loss of spatial control should lead to patholog-  
236 ical loss of homeostasis. Indeed, we note that multiple human carcinomas downregulate E-cad,  
237 upregulate Rhomboids, and activate EGFR<sup>27,75-77</sup>, and that progression of colorectal carcinoma,  
238 which initiates through loss of the catenin-destabilizing factor *APC* (adenomatous polyposis coli),  
239 requires upregulation of the mammalian Rhomboid *RHBDD1*<sup>78</sup>. Given these intriguing links, we  
240 propose that insights into the development of epithelial cancers may emerge from understanding  
241 E-cad-EGFR feedback control of steady-state epithelial turnover.

242

## 243 **METHODS**

244

### 245 ***Drosophila* Husbandry**

246

247 Crosses utilizing the GAL4/GAL80<sup>ts</sup> system were performed at 18°C. Upon eclosion, adult ani-  
248 mals remained at 18°C for 4 days, unless otherwise indicated. On adult day 4, animals were tem-  
249 perature shifted to 29°C to inactivate GAL80<sup>ts</sup> and induce GAL4-mediated expression. Midguts  
250 were harvested for immunostaining after appropriate lengths of induction (see figure legends for  
251 individual experiments). All other crosses were performed at 25°C; refer to figure legends for  
252 individual timepoint information. Adult female flies were used in all experiments.

253

### 254 **Fly Stocks**

255

256 *w; esgGAL4, tubGAL80ts, UAS-GFP; UAS-flp, act<CD2<GAL4 (esg<sup>F/O</sup>)* (Bruce Edgar) <sup>13</sup>

257 *mexGAL4* (Carl Thummel)

258 *esgGAL4* (Ben Ohlstein)

259 *y, w; TI{TI}shg[mTomato]* (Bloomington)

260 *UAS-E-cadherinRNAi* (TRiP.HMS00693) (Bloomington)

261 *UAS-E-cadherinRNAi* (TRiP.JF02769) (Bloomington)

262 *UAS-E-cadherinRNAi* (TRiP.GL00646) (Bloomington)

263 *UAS-echinoidRNAi* (TRiP.GL00648) (Bloomington)

264 *UAS-rhomboidRNAi* (TRiP.JF03106) (Bloomington)

265 *UAS-spitzRNAi* (TRiP.HMS01120) (Bloomington)

266 *UAS-kerenRNAi* (KK104299) (VDRC)

267 *UAS-armadilloRNAi* (TRiP.JF01251) (Bloomington)

268 *UAS-armadilloRNAi* (KK107344) (VDRC)

269 *UAS-p120ctnRNAi* (TRiP.HMC03276) (Bloomington)

270 *UAS-yorkieRNAi* (TRiP.JF03119) (Bloomington)

271 *UAS-unpaired3RNAi* (TRiP.HM05061) (Bloomington)

272 *UAS-hisH2A:RFP* (Bloomington)

273 *UAS-p35* (Bloomington)

274 *UAS-diap1* (Bloomington)

275 *UAS-E-cadherin<sup>DEFL</sup>* (Margaret Fuller) <sup>79</sup>

276 *UAS-rhomboid* (Bloomington)

277 *UAS-armadillo<sup>S10</sup>* (Bloomington)

278 *UAS-p120ctn* (Bloomington)

279 *UAS-groucho* (Amir Orian)

280 *UAS-puckered (puc2A)* (Huaqi Jiang)

281 *y w hsflp; X-15-29 w<sup>+</sup> ('split-lacZ')* <sup>19</sup>

282 *y w; y<sup>+</sup> X-15-33 ('split-lacZ')* <sup>19</sup>

283 *Egfr<sup>J24</sup>/T(2;3)TSTL* (Bloomington)

284 *Egfr<sup>tsla</sup>/T(2;3)TSTL* (Bloomington)

285 *w UAS-CD8:GFP hsflp; tubGAL4; FRT82 tubGAL80* (David Bilder) <sup>6</sup>

286 *w; FRT82* (David Bilder) <sup>6</sup>

287 *rho<sup>X81</sup> (rho-lacZ)* (Huaqi Jiang) <sup>80</sup>

288 *10xSTAT-GFP* (Bloomington)

289 *Upd3.1-lacZ* (Huaqi Jiang)

290 *cycE-lacZ* (Bloomington)

291

292 Detailed information on *Drosophila* genes and stocks is available from FlyBase

293 (<http://flybase.org/>).

294

## 295 **Immunohistochemistry and Microscopy**

296

297 Samples were fixed, immunostained, and mounted as previously described<sup>6</sup>. Primary antibodies:

298 mouse anti- $\beta$ -galactosidase (1:400, Promega Z3781), mouse anti-Armadillo (1:100, DSHB

299 N27A1), rabbit anti-cleaved caspase 3 (1:200, Cell Signaling, generous gift from D. Bilder<sup>6</sup>)

300 rabbit anti-diphospho-ERK (1:400, Cell Signaling 4370P), goat anti-HRP-Cy3 (Cappel, 1:100)

301 which stains stem cells and enteroblasts<sup>6</sup>, mouse anti-Coracle (1:50, DSHB C615.16), mouse

302 anti-Discs large C615.16 (1:50, DSHB 4F3), and rabbit anti-phospho-histone H3, Ser 10

303 (1:1000, EMD Millipore). Secondary antibodies: Alexa Fluor 488-, 555- or 647-conjugated don-

304 key anti-rabbit or anti-mouse IgGs (1:800, LifeTechnologies A31570, A11001, and A21244).

305 Nuclei were stained with DAPI (LifeTechnologies, 1:1000). Actin was stained with SiR-Actin

306 (Spirochrome, 1:500) or Alexa 647-conjugated phalloidin (1:100, LifeTechnologies). Samples

307 were mounted in ProLong (LifeTechnologies). Imaging of samples was performed on a Leica

308 SP8 confocal microscope, with serial optical sections taken at 3.5  $\mu$ m intervals through the en-

309 tirety of whole-mounted, immunostained midguts.

310

## 311 **Regionalization of the Adult Midgut; Cell Counts and Size Measurements of the R4ab** 312 **(P1-2) compartment**

313

314 The *Drosophila* midgut is compartmentalized along its proximal-distal axis. Each compartment

315 exhibits a characteristic digestive physiology, gene expression pattern, and stem cell division

316 rate<sup>14,15,81,82</sup>. In general, stem cell clones do not cross compartment boundaries<sup>15</sup>. Our study fo-

317 cused specifically on two adjacent compartments, known alternatively as R4ab or P1-2, which

318 comprise the major region of nutrient absorption<sup>14,15</sup>. We observed that R4ab consistently exhib-

319 ited complete cellular turnover between adult days 4-8, as indicated by *esg*<sup>F/O</sup> labeling (Fig. 1a-e,

320 Extended Data Fig. 1f-g). Other midgut compartments exhibited variable, incomplete turnover

321 during the same time period, consistent with prior reports<sup>9,83-85</sup>; they were not analyzed in this

322 study.

323

324 To perform total cell counts of R4ab, this region was first identified in confocal image stacks us-

325 ing morphological landmarks (Extended Data Fig 1b-e, g)<sup>14</sup> and digitally isolated in Fiji. Bit-

326 plane Imaris software algorithms were applied to generate three-dimensional organ reconstruc-

327 tions and comprehensively count individual cell nuclei by mapping DAPI signals to Imaris sur-

328 face objects. For analysis of *esg*<sup>F/O</sup> midguts, GFP<sup>+</sup> cells were additionally counted by mapping

329 DAPI/GFP colocalization signals to Imaris surface objects. R4ab lengths were measured by a

330 spline through the center of individual midguts in Fiji.

331

332

333

### 334 **Split-*lacZ* Clone Induction and Analysis**

335

336 As depicted in Fig. 1f, animals were raised at 18°C and shifted to 29°C four days post-eclosion.  
337 Split-*lacZ* clone induction<sup>19</sup> was performed by subjecting animals to two 30-min, 38.5°C heat  
338 shocks separated by a 5-min chill on ice. Four days after clone induction, midguts were im-  
339 munostained and clones in the R4ab region were identified and analyzed by visual examination  
340 of serial confocal sections. Clones in regions outside R4ab were excluded from analysis. Clone  
341 size was measured as the number of contiguous cells in one discrete clone, as previously de-  
342 scribed<sup>6</sup>. Approximately 1-3 single labeled enterocytes per R4ab region were observed, con-  
343 sistent with published reports<sup>9,86</sup>; these transient clones were not included in our quantification.  
344 Single labeled diploid cells were included because these likely represented individual stem cells  
345 that did not divide during the chase period. No labeled cells were observed in the absence of  
346 38.5°C heat shock.

347

348 Safeguards to ensure exclusion of non-stem cell (transient) clones: To ensure that clone counts  
349 comprised exclusively stem cell clones and excluded any non-stem cell (transient) clones that  
350 were directly labeled by the heat shock, our split-*lacZ* clonal analyses incorporated two, redun-  
351 dant safeguards. First, a 4-day chase period was included between heat-shock induction and sub-  
352 sequent clonal analysis. Because they are post-mitotic and transient, enteroblasts/enterocytes that  
353 were directly labeled by the heat shock would have been lost during the succeeding chase period.  
354 Confirming that transient clones were nearly absent, only 1-3 single labeled enterocytes were  
355 observed per midgut R4ab region after the 4-day chase. As a second safeguard, all single, labeled  
356 enterocytes were excluded from our clone counts.

357

### 358 **Sytox staining**

359

360 Sytox Green (ThermoFisher, 5mM in DMSO) or Sytox Orange (ThermoFisher, 5mM in DMSO)  
361 were diluted 1:5,000 in 5% sucrose. Sytox solution was fed to animals in an empty vial for 5-6  
362 hours, after which midguts were dissected and mounted in ProLong (LifeTechnologies). Because  
363 Sytox is incompatible with fixation, live organs were imaged immediately after mounting.

364

### 365 **MARCM Clone Inductions**

366

367 MARCM clone inductions<sup>59</sup> were performed by subjecting animals to two 30-min, 38.5°C heat  
368 shocks separated by a 5-min chill on ice. For single-enterocyte MARCM clones, animals were  
369 dissected five days post-induction and terminal clones consisting of one GFP<sup>+</sup> enterocyte (identi-  
370 fied by its polyploid nucleus) were selected for analysis. GFP<sup>+</sup> enterocytes were excluded from  
371 analysis if another GFP<sup>+</sup> clone was present within an 80 µm radius. Fiji was used to measure the  
372 distance between the plasma membrane of the nearest GFP<sup>+</sup> enterocyte and the center of dpERK<sup>+</sup>  
373 stem cells within a 60 µm radius. For mosaic analyses of multicell MARCM clones, animals  
374 were fed Sytox three days post-induction and dissected. The proportion of labeled clone cells  
375 (GFP<sup>+</sup>) that were also Sytox<sup>+</sup> was quantified.

376

377

378

379

## 380 AG1478 Drug Treatment

381

382 Stocks of AG1478 (Sigma) were dissolved in EtOH and subsequently diluted in dH<sub>2</sub>O to reach a  
383 working concentration of 100 μM AG1478 (in 0.02% EtOH). This 100 μM stock solution was  
384 used to prepare yeast paste, which was fed to animals as a supplement to their standard corn-  
385 meal-molasses diet for the duration of induced gene expression.

386

## 387 Smurf Assay

388

389 Smurf assays<sup>87</sup> were conducted by feeding adult animals yeast paste containing 2.5% Brilliant  
390 Blue FCF (Sigma) and scoring animals for leakage of dye into the abdomen. Animals were  
391 scored as ‘non-Smurf’ if the blue dye was confined to the GI tract and ‘Smurf’ if blue dye leaked  
392 outside the GI tract. As a positive control, animals were fed dye in conjunction with 1% SDS.

393

## 394 qRT-PCR

395

396 mRNA was extracted from midguts (5 animals/experiment) followed by cDNA synthesis with  
397 Invitrogen SuperStrand III First Script Super Mix (Invitrogen). Real-time PCR was performed  
398 using the relative standard curve method with SYBR GreenER Supermix (Invitrogen) on a  
399 StepOnePlus ABI machine. Expression levels were normalized to *mexGAL4<sup>ts</sup>>CD4-GFP* mid-  
400 guts; *mef2* transcripts were used as a reference<sup>6</sup>.

401

## 402 Statistical Analysis

403

404 All statistical analysis was performed using Graphpad Prism 6. For comparisons of clone size  
405 distributions, unpaired two-tailed Mann-Whitney tests were used to assess statistical signifi-  
406 cance. (Clone size distributions are non-normal, independent, and derived from a simple random  
407 sample.) For comparisons of cell numbers and gut length, unpaired two-tailed t-tests were used  
408 to assess statistical significance. (Organ cell number and size distributions are normal, independ-  
409 ent, and derived from a simple random sample.) For comparisons of *rho* gene expression, un-  
410 paired two-tailed t-tests were used to assess statistical significance. Legend: ns = not significant  
411 ( $p > 0.05$ ), \* =  $p < 0.05$ , \*\* =  $p < 0.01$ , \*\*\* =  $p < 0.001$ , and \*\*\*\* =  $p < 0.0001$ .

412

## 413 Study Design

414

415 Sample sizes were chosen based on our previous study<sup>6</sup>, which also characterized changes in  
416 organ cell number and clone sizes. In *split-lacZ* experiments, single enterocyte clones were ex-  
417 cluded from analysis. No other exclusion criteria were applied. No sample randomization or  
418 blinding was performed, although automated, Imaris-based computer algorithms were used to  
419 analyze and quantify most data in this study.

420

## 421 qPCR Primers

422

423 Primers for qPCR listed from 5' to 3':

424 *vein*-fwd GAACGCAGAGGTCACGAAGA

425 *vein*-rev GAGCGCACTATTAGCTCGGA

426 *spitz*-fwd CGCCCAAGAATGAAAGAGAG  
427 *spitz*-rev AGGTATGCTGCTGGTGG AAC  
428 *keren*-fwd CGTGTTTGGCAACAACAAGT  
429 *keren*-rev TGTGGCAATGCAGTTTAAGG  
430 *egfr*-fwd TGCATCGGCACTAAATCTCGG  
431 *egfr*-rev GGAAGCTGAGGTCCAAATTCTC  
432 *argos*-fwd TGCTGTTGGGTGAATTT CAGG  
433 *argos*-rev CGACTGGTCCAGATGATCCA  
434 *star*-fwd AGCCCAGTCCTTCAAACCC  
435 *star*-rev CCACAGTCTTTGGTTGGTTGC  
436 *rhomboïd*-fwd GAGCACATCTACATGCAACGC  
437 *rhomboïd*-rev GGAGATCACTAGGATGAACCAGG  
438 *frizzled 3*-fwd TCTTGTGCCCGCAAAACTTTA  
439 *frizzled 3*-rev CCTAGAATGAGGGTCTCAGACG  
440 *senseless*-fwd GATCGTGACTTTGCCTTGACG  
441 *senseless*-rev CCTGATAGTCCTGCTTGCTGT  
442 *expanded*-fwd GATGCTGGACACCGAACTCT  
443 *expanded*-rev CTTGCTCTCGGGATCTGC  
444 *diap1*-fwd GAAAAAGAGAAAAGCCGTCAAGT  
445 *diap1*-rev TGTTTGCCTGACTCTTAATTTCTTC  
446 *pointed*-fwd CTACGAGAAGCTGAGTCGCG  
447 *pointed*-rev TATCGTTTGCCTGCCGTCTT  
448 *cycE*-fwd ACAAATTTGGCCTGGGACTA  
449 *cycE*-rev GGCCATAAGCACTTCGTCA  
450 *upd1*-fwd CCTACTCGTCCTGCTCCTTG  
451 *upd1*-rev TGCGATAGTCGATCCAGTTG  
452 *upd2*-fwd GAGGGCAGCTACGACAGTG  
453 *upd2*-rev GGAGAAGAGTCGCAGGTTGT  
454 *upd3*-fwd AAATTCGACAAAGTCGCCTG  
455 *upd3*-rev TTCCACTGGATTCTGTTTC  
456 *wdp*-fwd TGGCAACCACAATGAGGAACAG  
457 *wdp*-rev GACCGAGAAGACCTTCCAGTCAAC  
458 *Socs36E*-fwd CAGTCAGCAATATGTTGTCG  
459 *Socs36E*-rev ACTTGCAGCATCGTCGCTTC  
460 *mef2*-fwd ATCGGCAGGTGACCTTCAAC  
461 *mef2*-rev GTTGTACTCGGTGTACTTGAGCAG

462

463 Primer sequences from Jiang et al. 2011<sup>46</sup>, Shaw et al. 2010<sup>88</sup>, and Fly Primer Bank  
464 (<http://www.flyrnai.org/FlyPrimerBank>).

465

466

467

468

469

470

471



472 **Genotypes by Figure**  
473

|                                                                                                                                                                                         |                                                                                                                                                                                                                                                                                                                                                                                                                                                                                                                                                                                                                                                                                                                                                                                      |
|-----------------------------------------------------------------------------------------------------------------------------------------------------------------------------------------|--------------------------------------------------------------------------------------------------------------------------------------------------------------------------------------------------------------------------------------------------------------------------------------------------------------------------------------------------------------------------------------------------------------------------------------------------------------------------------------------------------------------------------------------------------------------------------------------------------------------------------------------------------------------------------------------------------------------------------------------------------------------------------------|
| <p><b>Figure 1</b><br/>Figure 1a-e<br/>Figure 1g-i<br/>Figure 1h, j<br/>Figure 1k</p>                                                                                                   | <p><i>w; esgGAL4, tubGAL80ts, UAS-GFP; UAS-flp, act&lt;CD2&lt;GAL4<br/>hsflp; X-15-29, tubGAL80ts/X-15-33, mexGAL4; UAS-his2A:RFP<br/>hsflp; X-15-29, tubGAL80ts/X-15-33, mexGAL4; UAS-p35<br/>w; mexGAL4, tubGAL80ts; UAS-his2A:RFP<br/>w; mexGAL4, tubGAL80ts; UAS-p35<br/>w; mexGAL4, tubGAL80ts; UAS-diap1</i></p>                                                                                                                                                                                                                                                                                                                                                                                                                                                               |
| <p><b>Figure 2</b><br/>Figure 2a<br/>Figure 2b, c<br/>Figure 2b, d<br/>Figure 2b, e<br/>Figure 2b, f<br/>Figure 2b, g<br/>Figure 2h, i<br/>Figure 2h, j<br/>Figure 2h<br/>Figure 2k</p> | <p><i>y, w; TI{TI}shg[mTomato]<br/>hsflp; X-15-29, tubGAL80ts/X-15-33, mexGAL4; UAS-his2A:RFP<br/>hsflp; X-15-29, tubGAL80ts/X-15-33, mexGAL4; UAS-p35<br/>hsflp; X-15-29, tubGAL80ts/X-15-33, mexGAL4; UAS-p35, UAS-E-cadRNAi<br/>hsflp; X-15-29, tubGAL80ts/X-15-33, mexGAL4; UAS-E-cad<br/>hsflp; X-15-29, tubGAL80ts/X-15-33, mexGAL4; UAS-E-cadRNAi<br/>w; mexGAL4, tubGAL80ts; UAS-his2A:RFP<br/>w; mexGAL4, tubGAL80ts; UAS-p35, UAS-E-cadRNAi<br/>w; mexGAL4, tubGAL80ts; UAS-p35<br/>w; mexGAL4, tubGAL80ts; UAS-E-cadRNAi<br/>w; mexGAL4, tubGAL80ts; UAS-p35, UAS-edRNAi<br/>hsflp; X-15-29, tubGAL80ts/X-15-33, esgGAL4; UAS-his2A:RFP<br/>hsflp; X-15-29, tubGAL80ts/X-15-33, esgGAL4; UAS-E-cad<br/>hsflp; X-15-29, tubGAL80ts/X-15-33, esgGAL4; UAS-E-cadRNAi</i></p> |
| <p><b>Figure 3</b><br/>Figure 3a, h<br/>Figure 3b<br/>Figure 3c-d, f<br/>Figure 3e<br/>Figure 3g<br/>Figure 3h<br/>Figure 3j, l<br/>Figure 3k</p>                                       | <p><i>w; mexGAL4, tubGAL80ts; UAS- his2A:RFP<br/>w; mexGAL4, tubGAL80ts; UAS-E-cad<br/>w; mexGAL4, tubGAL80ts; UAS-E-cadRNAi<br/>w; Egfr<sup>tsla</sup>/Egfr<sup>f24</sup>; mexGAL4 TM2/tubGAL80ts, UAS-E-cadRNAi<br/>hsflp; X-15-29, tubGAL80ts/X-15-33, mexGAL4; UAS-p35, UAS-E-cadRNAi<br/>w; mexGAL4, tubGAL80ts; UAS-p35, UAS-E-cadRNAi<br/>w; mexGAL4, tubGAL80ts; UAS-p35<br/>w; mexGAL4, tubGAL80ts; UAS-p35, UAS-E-cadRNAi, UAS-spiRNAi<br/>w; mexGAL4, tubGAL80ts; UAS-p35, UAS-E-cadRNAi, UAS-krnRNAi<br/>w; mexGAL4, tubGAL80ts, UAS-spiRNAi; UAS-p35, UAS-E-cadRNAi, UAS-krnRNAi<br/>w UAS-CD8:GFP hsflp; tubGAL4/UAS-E-cadRNAi; FRT82 tubGAL80/FRT82<br/>w UAS-CD8:GFP hsflp; tubGAL4; FRT82 tubGAL80/FRT82</i></p>                                                    |
| <p><b>Figure 4</b><br/>Figure 4a<br/>Figure 4a-b<br/>Figure 4c<br/>Figure 4d-f<br/>Figure 4g, k<br/>Figure 4h, k<br/>Figure 4i, k</p>                                                   | <p><i>w; mexGAL4, tubGAL80ts; UAS-CD4:GFP<br/>w; mexGAL4, tubGAL80ts; UAS-E-cad<br/>w; mexGAL4, tubGAL80ts; UAS-E-cadRNAi<br/>w; mexGAL4, tubGAL80ts; UAS-E-cadRNAi, UAS-rhoRNAi<br/>rho<sup>X81</sup> (rho-lacZ)<br/>w; mexGAL4, tubGAL80ts; UAS- his2A:RFP<br/>w; mexGAL4, tubGAL80ts; UAS-p35<br/>w; mexGAL4, tubGAL80ts; UAS-p35, UAS-E-cadRNAi</i></p>                                                                                                                                                                                                                                                                                                                                                                                                                          |

|                  |                                                                                                                                                                                                                                                                                                                                                                                                                                                                            |
|------------------|----------------------------------------------------------------------------------------------------------------------------------------------------------------------------------------------------------------------------------------------------------------------------------------------------------------------------------------------------------------------------------------------------------------------------------------------------------------------------|
| Figure 4j-k      | <i>w; mexGAL4, tubGAL80ts; UAS-p35, UAS-E-cadRNAi, rhoRNAi</i>                                                                                                                                                                                                                                                                                                                                                                                                             |
| Figure 4k        | <i>w; mexGAL4, tubGAL80ts, UAS-rho; UAS-p35</i><br><i>w; mexGAL4, tubGAL80ts; UAS-p35, UAS-E-cadRNAi, UAS-armRNAi</i><br><i>w; mexGAL4, tubGAL80ts; UAS-p35, UAS-E-cadRNAi, UAS-p120RNAi</i><br><i>w; mexGAL4, tubGAL80ts, UAS-armRNAi; UAS-p35, UAS-E-cadRNAi, UAS-p120RNAi</i><br><i>UAS-arm<sup>S10</sup>; mexGAL4, tubGAL80ts; UAS-p35</i><br><i>w; mexGAL4, tubGAL80ts; UAS-p35, UAS-p120</i><br><i>UAS-arm<sup>S10</sup>; mexGAL4, tubGAL80ts; UAS-p35, UAS-p120</i> |
| <b>Ext. Data</b> |                                                                                                                                                                                                                                                                                                                                                                                                                                                                            |
| Figure 1f-g      | <i>w; esgGAL4, tubGAL80ts, UAS-GFP; UAS-flp, act&lt;CD2&lt;GAL4</i>                                                                                                                                                                                                                                                                                                                                                                                                        |
| Figure 3a        | See corresponding “Total Cells (R4ab)” panels – Fig 1k, 2h, 3h, 4k                                                                                                                                                                                                                                                                                                                                                                                                         |
| Figure 3b        | See corresponding “dpERK” panels – Fig 3, 4, Extended Data Fig 7                                                                                                                                                                                                                                                                                                                                                                                                           |
| Figure 4         | <i>w; mexGAL4, tubGAL80ts; UAS-his2A:RFP</i><br><i>w; mexGAL4, tubGAL80ts; UAS-p35</i><br><i>w; mexGAL4, tubGAL80ts; UAS-E-cadRNAi</i>                                                                                                                                                                                                                                                                                                                                     |
| Figure 5a-c      | <i>w UAS-CD8:GFP hsflp; tubGAL4; FRT82 tubGAL80/FRT82</i><br><i>w UAS-CD8:GFP hsflp; tubGAL4/UAS-E-cadRNAi; FRT82 tubGAL80/FRT82</i>                                                                                                                                                                                                                                                                                                                                       |
| Figure 5e-f      | <i>w; mexGAL4, tubGAL80ts; UAS-his2A:RFP</i><br><i>w; mexGAL4, tubGAL80ts; UAS-E-cadRNAi</i>                                                                                                                                                                                                                                                                                                                                                                               |
| Figure 6a        | <i>w; mexGAL4, tubGAL80ts; UAS-CD4:GFP</i><br><i>w; mexGAL4, tubGAL80ts; UAS-E-cadRNAi</i>                                                                                                                                                                                                                                                                                                                                                                                 |
| Figure 6b-d      | <i>w; mexGAL4, tubGAL80ts; UAS-his2A:RFP, upd3.1-lacZ</i><br><i>w; mexGAL4, tubGAL80ts; UAS-E-cadRNAi, upd3.1-lacZ</i>                                                                                                                                                                                                                                                                                                                                                     |
| Figure 6e-g      | <i>w; mexGAL4, tubGAL80ts, 10XSTAT-GFP; UAS-his2A:RFP</i><br><i>w; mexGAL4, tubGAL80ts, 10XSTAT-GFP; UAS-E-cadRNAi</i>                                                                                                                                                                                                                                                                                                                                                     |
| Figure 6h-j      | <i>w; mexGAL4, tubGAL80ts; UAS-his2A:RFP, cycE-lacZ</i><br><i>w; mexGAL4, tubGAL80ts; UAS-E-cadRNAi, cycE-lacZ</i>                                                                                                                                                                                                                                                                                                                                                         |
| Figure 6k        | <i>w; upd3.1-lacZ</i>                                                                                                                                                                                                                                                                                                                                                                                                                                                      |
| Figure 7a-b      | <i>w; mexGAL4, tubGAL80ts; UAS-CD4:GFP (qPCR reference cDNA)</i>                                                                                                                                                                                                                                                                                                                                                                                                           |
| Figure 7a        | <i>w; mexGAL4, tubGAL80ts; UAS-E-cadRNAi</i><br><i>w; mexGAL4, tubGAL80ts; UAS-E-cadRNAi, UAS-groucho</i><br><i>w; mexGAL4, tubGAL80ts; UAS-E-cadRNAi, UAS-puc2A</i><br><i>w; mexGAL4, tubGAL80ts; UAS-E-cadRNAi, UAS-ykiRNAi</i><br><i>w; mexGAL4, tubGAL80ts; UAS-E-cadRNAi, UAS-armRNAi</i><br><i>w; mexGAL4, tubGAL80ts; UAS-E-cadRNAi, UAS-p120RNAi</i>                                                                                                               |
| Figure 7b        | <i>UAS-arm<sup>S10</sup>; mexGAL4, tubGAL80ts</i><br><i>w; mexGAL4, tubGAL80ts; UAS-p120</i>                                                                                                                                                                                                                                                                                                                                                                               |
| Figure 7c-f      | <i>w; mexGAL4, tubGAL80ts; UAS-his2A:RFP, rho<sup>X81</sup>(rho-lacZ)</i><br><i>w; mexGAL4, tubGAL80ts; UAS-E-cadRNAi, rho<sup>X81</sup></i><br><i>w; mexGAL4, tubGAL80ts; UAS-E-cad, rho<sup>X81</sup></i><br><i>UAS-arm<sup>S10</sup>; mexGAL4, tubGAL80ts; rho<sup>X81</sup></i><br><i>w; mexGAL4, tubGAL80ts, UAS-p120; rho<sup>X81</sup></i>                                                                                                                          |
| Figure 7g-l      | Same as Extended Data Figure 7a<br><i>w; mexGAL4, tubGAL80ts; UAS-E-cadRNAi, UAS-upd3RNAi</i><br><i>w; mexGAL4, tubGAL80ts, UAS-armRNAi; UAS-E-cadRNAi, UAS-p120RNAi</i>                                                                                                                                                                                                                                                                                                   |
| Figure 7m-n, s   | <i>w; mexGAL4, tubGAL80ts; UAS-his2A:RFP</i>                                                                                                                                                                                                                                                                                                                                                                                                                               |

|             |                                                                                                                                                                                                                                                                                                                     |
|-------------|---------------------------------------------------------------------------------------------------------------------------------------------------------------------------------------------------------------------------------------------------------------------------------------------------------------------|
| Figure 7o-r | <i>w; mexGAL4, tubGAL80ts, UAS-rho</i><br>Same as Extended Data Figure 7b                                                                                                                                                                                                                                           |
| Figure 8    | <i>w; mexGAL4, tubGAL80ts; UAS-E-cadRNAi, UAS-rhoRNAi</i><br><i>UAS-arm<sup>S10</sup>; mexGAL4, tubGAL80ts; UAS-p120</i><br><i>w; mexGAL4, tubGAL80ts; UAS-his2A:RFP</i><br><i>w; mexGAL4, tubGAL80ts, UAS-rhoRNAi</i><br><i>w; mexGAL4, tubGAL80ts; UAS-armRNAi</i><br><i>w; mexGAL4, tubGAL80ts; UAS-p120RNAi</i> |

474

475

## 476 REFERENCES

- 477 1. Leblond, C. P. & Stevens, C. E. The constant renewal of the intestinal epithelium in the  
478 albino rat. *Anat. Rec.* **100**, 357–377 (1948).
- 479 2. Pellettieri, J. & Alvarado, A. S. Cell turnover and adult tissue homeostasis: From humans  
480 to planarians. *Annu Rev Genet* **41**, 83–105 (2007).
- 481 3. O'Brien, L. E. & Bilder, D. Beyond the niche: Tissue-level coordination of stem cell dy-  
482 namics. *Annu. Rev. Cell. Dev. Biol.* **29**, 107–136 (2013).
- 483 4. Siudeja, K. *et al.* Frequent somatic mutation in adult intestinal stem cells drives neoplasia  
484 and genetic mosaicism during aging. *Cell Stem Cell* **17**, 663–674 (2015).
- 485 5. Alcolea, M. P. *et al.* Differentiation imbalance in single oesophageal progenitor cells  
486 causes clonal immortalization and field change. *Nature Cell Biology* **16**, 615–622 (2014).
- 487 6. O'Brien, L. E., Soliman, S. S., Li, X. & Bilder, D. Altered modes of stem cell division  
488 drive adaptive intestinal growth. *Cell* **147**, 603–614 (2011).
- 489 7. Visvader, J. E. Cells of origin in cancer. *Nature* **469**, 314–322 (2011).
- 490 8. Micchelli, C. A. & Perrimon, N. Evidence that stem cells reside in the adult *Drosophila*  
491 midgut epithelium. *Nature* **439**, 475–479 (2006).
- 492 9. Ohlstein, B. & Spradling, A. The adult *Drosophila* posterior midgut is maintained by plu-  
493 ripotent stem cells. *Nature* **439**, 470–474 (2006).
- 494 10. Clermont, Y. & Leblond, C. P. Renewal of spermatogonia in the rat. *Am. J. Anat.* **93**, 475–  
495 501 (1953).
- 496 11. Biteau, B., Hochmuth, C. E. & Jasper, H. Maintaining tissue homeostasis: dynamic con-  
497 trol of somatic stem cell activity. *Cell Stem Cell* **9**, 402–411 (2011).
- 498 12. Clevers, H. What is an adult stem cell? *Science* **350**, 1319–1320 (2015).
- 499 13. Jiang, H. *et al.* Cytokine/Jak/Stat signaling mediates regeneration and homeostasis in the  
500 *Drosophila* midgut. *Cell* **137**, 1343–1355 (2009).
- 501 14. Buchon, N. *et al.* Morphological and molecular characterization of adult midgut compart-  
502 mentalization in *Drosophila*. *Cell Rep* **3**, 1725–1738 (2013).
- 503 15. Marianes, A. & Spradling, A. C. Physiological and stem cell compartmentalization within  
504 the *Drosophila* midgut. *eLife* **2**, e00886 (2013).
- 505 16. Ohlstein, B. & Spradling, A. Multipotent *Drosophila* intestinal stem cells specify daughter  
506 cell fates by differential notch signaling. *Science* **315**, 988–992 (2007).
- 507 17. Hudry, B., Khadayate, S. & Miguel-Aliaga, I. The sexual identity of adult intestinal stem  
508 cells controls organ size and plasticity. *Nature* **530**, 344–348 (2016).

- 509 18. Chen, H., Zheng, X. & Zheng, Y. Age-associated loss of lamin-B leads to systemic in-  
510 flammation and gut hyperplasia. *Cell* **159**, 829–843 (2014).
- 511 19. Harrison, D. A. & Perrimon, N. Simple and efficient generation of marked clones in Dro-  
512 sophila. **3**, 424–433 (1993).
- 513 20. de Navascués, J. *et al.* Drosophila midgut homeostasis involves neutral competition be-  
514 tween symmetrically dividing intestinal stem cells. *EMBO J* **31**, 2473–2485 (2012).
- 515 21. Ayyaz, A., Li, H. & Jasper, H. Haemocytes control stem cell activity in the Drosophila  
516 intestine. *Nature Cell Biology* **17**, 736–748 (2015).
- 517 22. Takeishi, A. *et al.* Homeostatic epithelial renewal in the gut is required for dampening a  
518 fatal systemic wound response in Drosophila. *Cell Rep* **3**, 919–930 (2013).
- 519 23. Kessler, T. & Müller, H. A. J. Cleavage of Armadillo/beta-catenin by the caspase DrICE  
520 in Drosophila apoptotic epithelial cells. *BMC Dev. Biol.* **9**, 15 (2009).
- 521 24. Steinhilber, U. *et al.* Cleavage and shedding of E-cadherin after induction of apoptosis. *J.*  
522 *Biol. Chem.* **276**, 4972–4980 (2001).
- 523 25. Keller, S. H. & Nigam, S. K. Biochemical processing of E-cadherin under cellular stress.  
524 *Biochemical and Biophysical Research Communications* **307**, 215–223 (2003).
- 525 26. Hung, C.-F., Chiang, H.-S., Lo, H.-M., Jian, J.-S. & Wu, W.-B. E-cadherin and its down-  
526 stream catenins are proteolytically cleaved in human HaCaT keratinocytes exposed to  
527 UVB. *Exp. Dermatol.* **15**, 315–321 (2006).
- 528 27. Jeanes, A., Gottardi, C. J. & Yap, A. S. Cadherins and cancer: how does cadherin dysfunc-  
529 tion promote tumor progression? *Oncogene* **27**, 6920–6929 (2008).
- 530 28. Hermiston, M. L. & Gordon, J. I. In vivo analysis of cadherin function in the mouse intes-  
531 tinal epithelium: Essential roles in adhesion, maintenance of differentiation, and regulation  
532 of programmed cell death. *The Journal of Cell Biology* **129**, 489–506 (1995).
- 533 29. Watabe, M., Nagafuchi, A., Tsukita, S. & Takeichi, M. Induction of polarized cell-cell  
534 association and retardation of growth by activation of the E-cadherin-catenin adhesion  
535 system in a dispersed carcinoma line. *The Journal of Cell Biology* **127**, 247–256 (1994).
- 536 30. Kim, N.-G., Koh, E., Chen, X. & Gumbiner, B. M. E-cadherin mediates contact inhibition  
537 of proliferation through Hippo signaling-pathway components. *Proceedings of the Na-*  
538 *tional Academy of Sciences* **108**, 11930–11935 (2011).
- 539 31. McClatchey, A. I. & Yap, A. S. Contact inhibition (of proliferation) redux. *Curr Opin Cell*  
540 *Biol* **24**, 685–694 (2012).
- 541 32. Huang, J., Zhou, W., Dong, W., Watson, A. M. & Hong, Y. Directed, efficient, and versa-  
542 tile modifications of the Drosophila genome by genomic engineering. *Proceedings of the*  
543 *National Academy of Sciences* **106**, 8284–8289 (2009).
- 544 33. Kolahgar, G. *et al.* Cell Competition Modifies Adult Stem Cell and Tissue Population Dy-  
545 namics in a JAK-STAT-Dependent Manner. *Developmental Cell* **34**, 297–309 (2015).
- 546 34. Campbell, K. & Casanova, J. A role for E-cadherin in ensuring cohesive migration of a  
547 heterogeneous population of non-epithelial cells. *Nat Commun* **6**, 7998 (2015).
- 548 35. Maeda, K., Takemura, M., Umemori, M. & Adachi-Yamada, T. E-cadherin prolongs the  
549 moment for interaction between intestinal stem cell and its progenitor cell to ensure Notch  
550 signaling in adult Drosophila midgut. *Genes to Cells* **13**, 1219–1227 (2008).
- 551 36. Choi, N.-H., Lucchetta, E. & Ohlstein, B. Nonautonomous regulation of Drosophila mid-  
552 gut stem cell proliferation by the insulin-signaling pathway. *Proceedings of the National*

- 553 *Academy of Sciences* **108**, 18702–18707 (2011).
- 554 37. Nelson, W. J. & Nusse, R. Convergence of Wnt, beta-catenin, and cadherin pathways.  
555 *Science* **303**, 1483–1487 (2004).
- 556 38. Yang, C.-C. *et al.* Differential regulation of the Hippo pathway by adherens junctions and  
557 apical-basal cell polarity modules. *Proceedings of the National Academy of Sciences* **112**,  
558 1785–1790 (2015).
- 559 39. Geletu, M., Guy, S., Arulanandam, R., Feracci, H. & Raptis, L. Engaged for survival:  
560 From cadherin ligation to STAT3 activation. *JAKSTAT* **2**, e27363 (2013).
- 561 40. Dumstrei, K., Wang, F., Shy, D., Tepass, U. & Hartenstein, V. Interaction between EGFR  
562 signaling and DE-cadherin during nervous system morphogenesis. *Development* **129**,  
563 3983–3994 (2002).
- 564 41. Lu, L. *et al.* LRIG1 regulates cadherin-dependent contact inhibition directing epithelial  
565 homeostasis and pre-invasive squamous cell carcinoma development. *J Pathol* **229**, 608–  
566 620 (2013).
- 567 42. Takahashi, K. & Suzuki, K. Density-dependent inhibition of growth involves prevention  
568 of EGF receptor activation by E-cadherin-mediated cell-cell adhesion. *Exp Cell Res* **226**,  
569 214–222 (1996).
- 570 43. Takashima, S. & Hartenstein, V. Genetic control of intestinal stem cell specification and  
571 development: a comparative view. *Stem Cell Rev* **8**, 597–608 (2012).
- 572 44. Biteau, B. & Jasper, H. EGF signaling regulates the proliferation of intestinal stem cells in  
573 *Drosophila*. *Development* **138**, 1045–1055 (2011).
- 574 45. Lucchetta, E. M. & Ohlstein, B. The *Drosophila* midgut: a model for stem cell driven tis-  
575 sue regeneration. *WIREs Dev Biol* **1**, 781–788 (2012).
- 576 46. Jiang, H., Grenley, M. O., Bravo, M.-J., Blumhagen, R. Z. & Edgar, B. A.  
577 EGFR/Ras/MAPK signaling mediates adult midgut epithelial homeostasis and regenera-  
578 tion in *Drosophila*. *Cell Stem Cell* **8**, 84–95 (2011).
- 579 47. Cordero, J. B., Stefanatos, R. K., Myant, K., Vidal, M. & Sansom, O. J. Non-autonomous  
580 crosstalk between the Jak/Stat and Egfr pathways mediates Apc1-driven intestinal stem  
581 cell hyperplasia in the *Drosophila* adult midgut. *Development* **139**, 4524–4535 (2012).
- 582 48. Zhou, F., Rasmussen, A., Lee, S. & Agaisse, H. The UPD3 cytokine couples environmen-  
583 tal challenge and intestinal stem cell division through modulation of JAK/STAT signaling  
584 in the stem cell microenvironment. *Developmental Biology* **373**, 383–393 (2013).
- 585 49. Osman, D. *et al.* Autocrine and paracrine unpaired signaling regulate intestinal stem cell  
586 maintenance and division. *Journal of Cell Science* **125**, 5944–5949 (2012).
- 587 50. Jiang, H. & Edgar, B. A. EGFR signaling regulates the proliferation of *Drosophila* adult  
588 midgut progenitors. *Development* **136**, 483–493 (2009).
- 589 51. Xu, N. *et al.* EGFR, Wingless and JAK/STAT signaling cooperatively maintain *Drosophila*-  
590 intestinal stem cells. *Developmental Biology* **354**, 31–43 (2011).
- 591 52. Buchon, N., Broderick, N. A., Kuraishi, T. & Lemaitre, B. *Drosophila* EGFR pathway co-  
592 ordinates stem cell proliferation and gut remodeling following infection. *BMC Biol* **8**, 152  
593 (2010).
- 594 53. Jin, Y. *et al.* EGFR/Ras signaling controls *Drosophila* intestinal stem cell proliferation via  
595 Capicua-regulated genes. *PLoS Genetics* **11**, e1005634 (2015).
- 596 54. Strand, M. & Micchelli, C. A. Regional control of *Drosophila* gut stem cell proliferation:

- 597 EGF establishes GSSC proliferative set point & controls emergence from quiescence.  
598 *PLoS ONE* **8**, e80608 (2013).
- 599 55. Qian, X., Karpova, T., Sheppard, A. M., McNally, J. & Lowy, D. R. E-cadherin-mediated  
600 adhesion inhibits ligand-dependent activation of diverse receptor tyrosine kinases. *EMBO*  
601 *J* **23**, 1739–1748 (2004).
- 602 56. Guo, Z. *et al.* E-cadherin interactome complexity and robustness resolved by quantitative  
603 proteomics. *Sci Signal* **7**, rs7–rs7 (2014).
- 604 57. Roy, S., Hsiung, F. & Kornberg, T. B. Specificity of *Drosophila* cytonemes for distinct  
605 signaling pathways. *Science* **332**, 354–358 (2011).
- 606 58. Lander, A. D. Morpheus unbound: reimagining the morphogen gradient. *Cell* **128**, 245–  
607 256 (2007).
- 608 59. Lee, T. & Luo, L. Mosaic analysis with a repressible cell marker for studies of gene func-  
609 tion in neuronal morphogenesis. *Neuron* **22**, 451–461 (1999).
- 610 60. Lee, J. R., Urban, S., Garvey, C. F. & Freeman, M. Regulated intracellular ligand  
611 transport and proteolysis control EGF signal activation in *Drosophila*. *Cell* **107**, 161–171  
612 (2001).
- 613 61. Urban, S., Lee, J. R. & Freeman, M. A family of Rhomboid intramembrane proteases ac-  
614 tivates all *Drosophila* membrane-tethered EGF ligands. *EMBO J* **21**, 4277–4286 (2002).
- 615 62. McCrea, P. D., Gu, D. & Balda, M. S. Junctional music that the nucleus hears: cell-cell  
616 contact signaling and the modulation of gene activity. *Cold Spring Harb Perspect Biol* **1**,  
617 a002923–a002923 (2009).
- 618 63. Du, W. *et al.* From cell membrane to the nucleus: An emerging role of E-cadherin in gene  
619 transcriptional regulation. *J. Cell. Mol. Med.* **18**, 1712–1719 (2014).
- 620 64. Daniel, J. M. & Reynolds, A. B. The catenin p120(ctn) interacts with Kaiso, a novel  
621 BTB/POZ domain zinc finger transcription factor. *Mol Cell Biol* **19**, 3614–3623 (1999).
- 622 65. Kelly, K. F. NLS-dependent nuclear localization of p120ctn is necessary to relieve Kaiso-  
623 mediated transcriptional repression. *Journal of Cell Science* **117**, 2675–2686 (2004).
- 624 66. Park, J.-I. *et al.* Kaiso/p120-catenin and TCF/beta-catenin complexes coordinately regu-  
625 late canonical Wnt gene targets. *Developmental Cell* **8**, 843–854 (2005).
- 626 67. Hosking, C. R. *et al.* The Transcriptional Repressor Glis2 Is a Novel Binding Partner for  
627 p120 Catenin. *Mol Biol Cell* **18**, 1918–1927 (2007).
- 628 68. Lee, M., Ji, H., Furuta, Y., Park, J.-I. & McCrea, P. D. p120-catenin regulates REST and  
629 CoREST, and modulates mouse embryonic stem cell differentiation. *Journal of Cell Sci-*  
630 *ence* **127**, 4037–4051 (2014).
- 631 69. Cavallo, R. A. *et al.* *Drosophila* Tcf and Groucho interact to repress Wingless signalling  
632 activity. *Nature* **395**, 604–608 (1998).
- 633 70. Daniels, D. L. & Weis, W. I. Beta-catenin directly displaces Groucho/TLE repressors  
634 from Tcf/Lef in Wnt-mediated transcription activation. *Nat. Struct. Mol. Biol.* **12**, 364–  
635 371 (2005).
- 636 71. Zhang, T. & Du, W. Groucho restricts rhomboid expression and couples EGFR activation  
637 with R8 selection during *Drosophila* photoreceptor differentiation. *Developmental Biology*  
638 **407**, 246–255 (2015).
- 639 72. Desai, T. J., Brownfield, D. G. & Krasnow, M. A. Alveolar progenitor and stem cells in  
640 lung development, renewal and cancer. **507**, 190–194 (2014).

- 641 73. Lei, K. *et al.* Egf signaling directs neoblast repopulation by regulating asymmetric cell  
642 division in planarians. *Developmental Cell* **38**, 413–429 (2016).
- 643 74. Gilboa, L. & Lehmann, R. Soma-germline interactions coordinate homeostasis and growth  
644 in the *Drosophila* gonad. *Nature* **443**, 97–100 (2006).
- 645 75. Abba, M. C. *et al.* Rhomboid domain containing 2 (RHBDD2): a novel cancer-related  
646 gene over-expressed in breast cancer. *Biochim Biophys Acta* **1792**, 988–997 (2009).
- 647 76. Yan, Z. *et al.* Human rhomboid family-1 gene silencing causes apoptosis or autophagy to  
648 epithelial cancer cells and inhibits xenograft tumor growth. *Mol. Cancer Ther.* **7**, 1355–  
649 1364 (2008).
- 650 77. Zou, H. *et al.* Human rhomboid family-1 gene RHBDF1 participates in GPCR-mediated  
651 transactivation of EGFR growth signals in head and neck squamous cancer cells. *FASEB*  
652 *J.* **23**, 425–432 (2009).
- 653 78. Song, W. *et al.* Rhomboid domain containing 1 promotes colorectal cancer growth  
654 through activation of the EGFR signalling pathway. *Nat Commun* **6**, 8022 (2015).

655

656

657 **Acknowledgments:** J.L. was supported by NSF GRFP DGE-114747 and NIH T32GM007276.  
658 This work was supported by NIH R03DK104027 and R01GM116000-01A1 to L.E.O. Confocal  
659 microscopy was performed at the Stanford Beckman Cell Sciences Imaging Facility (NIH  
660 1S10OD01058001A1). We thank D. Bilder for the gift of cCas-3 antibody; the Developmental  
661 Studies Hybridoma Bank for other antibodies; D. Bilder, B. Edgar, M. Fuller, H. Jiang, B. Ohl-  
662 stein, C. Thummel, the Bloomington *Drosophila* Stock Center (NIH P40OD018537), the TRiP at  
663 Harvard Medical School (NIH/NIGMS R01-GM084947), and the Vienna *Drosophila* Resource  
664 Center for fly stocks; J. Axelrod, M. Goodman, M. Fuller, W.J. Nelson, R. Nusse, M. Krasnow,  
665 T. Nystul, and D. Fox for comments on the manuscript; and B. Benham-Pyle, M. Mirvis, N.  
666 Pierce, and D. Gordon for helpful discussions. The authors declare no competing interests.

667

668 **Author contributions:** J.L. and L.E.O. designed the experiments and wrote the manuscript. J.L.,  
669 S.B., and S.N. performed confocal microscopy. J.L. and S.N. prepared microscopy specimens.  
670 J.L. performed all other experiments, genetic crosses, data analysis, and statistical analysis.

671

672 **Author information:** The authors declare no competing financial interests. Correspondence and  
673 requests for materials should be addressed to L.E.O. (lucye@stanford.edu)

## FIGURES

Figure 1

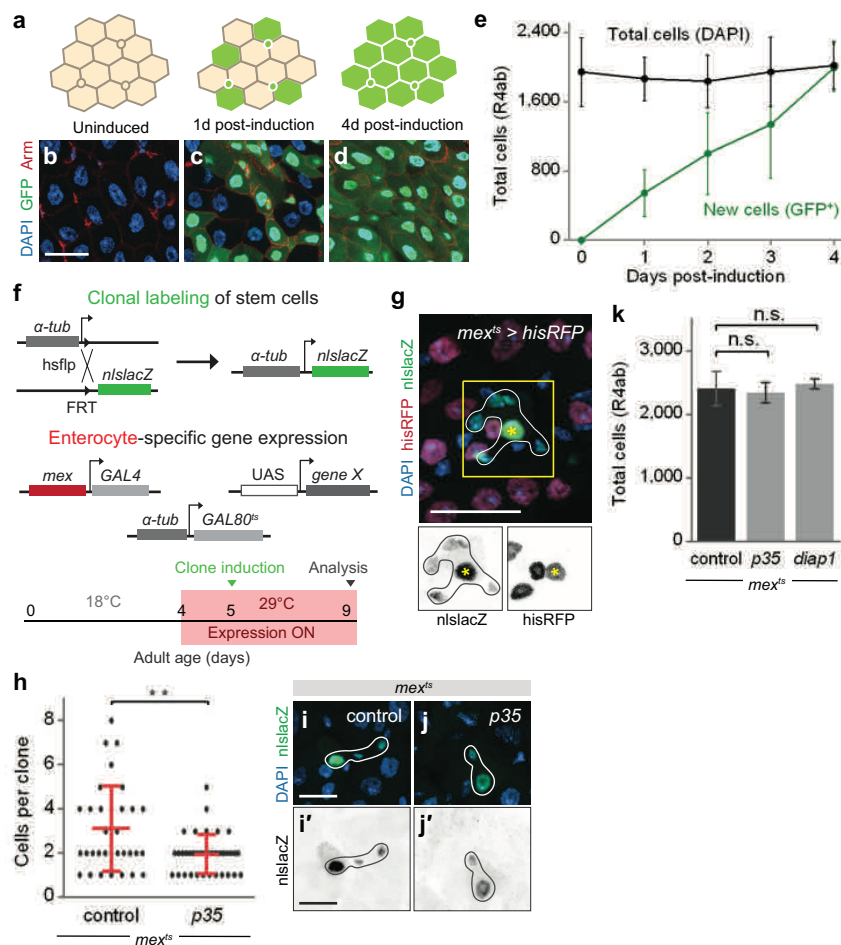

**Fig. 1. Enterocyte apoptosis regulates the rate of stem cell division for homeostatic maintenance of overall cell number.**

**a-e**, The midgut R4ab compartment undergoes complete cell turnover in 4 days. **a**, Cartoon of *esg<sup>F/O</sup> > GFP* labeling strategy to quantify kinetics of turnover. Before induction, all progenitor cells (stem and enteroblast cells, small circles) and mature enterocytes (hexagons) are unmarked (tan). Upon induction by 29°C temperature shift, all progenitor cells express GFP (green). Post-induction, newly generated enterocytes inherit GFP expression from progenitors, while pre-existing enterocytes stay unmarked. Cell turnover is complete when all cells are GFP<sup>+</sup>. See also Extended Data Fig 1. **b-d**, Representative images of *esg<sup>F/O</sup> > GFP* midguts before induction, 1 day post-induction, and 4 days post-induction. DAPI (blue) marks all nuclei. Armadillo (Arm, red) marks cell boundaries. **e**, Quantification of total (DAPI<sup>+</sup>) and new (GFP<sup>+</sup>) cells in the R4ab



compartment over time<sup>14,15</sup>. Number of total cells stays near-constant. Number of GFP<sup>+</sup> cells increases linearly. After 4 days, number of GFP<sup>+</sup> cells becomes equal to total cells. Each time point represents 3 midguts. **f-g**, Tracing stem cell divisions in a background of genetically manipulated enterocytes. **f**, Clonal labeling of stem cell divisions is induced by a brief pulse of FRT recombination that reconstitutes a split *α-tub-nlslacZ* transgene. Enterocyte-specific gene expression is turned on by 29°C shift that permits *mexGAL4* to drive expression of UAS-*gene X* (*mex<sup>ts</sup>>gene X*). See also Extended Data Fig. 2. **g**, Validation of genetic system using *mex<sup>ts</sup>>his2av::RFP*. β-galactosidase marks a stem cell clone (outlined) in a background of His2av::RFP<sup>+</sup> enterocytes. Within the 5-cell clone, only the enterocyte (yellow asterisk, polyploid) expresses *his2av::RFP*. **h-k**, Blocking enterocyte apoptosis causes fewer stem cell divisions but does not change total cell number. **h**, Clone size analysis in the R4ab compartment. Each point is the number of cells in one β-gal-marked clone. Data pooled from 4-5 midguts per genotype. Values are means ± S.D. Mann-Whitney test, *p*=0.009. **i-j**, Images show average-sized clones. **k**, Total R4ab cell counts are comparable for control, *mex<sup>ts</sup>>p35* and *mex<sup>ts</sup>>diap1* midguts. Cells were counted 4 days post-induction. N=4 midguts per genotype. Values are means ± S.D. Unpaired t-test, *p*>0.05. One of three representative experiments is shown in each graph. All scale bars are 25 μm.

**Figure 2**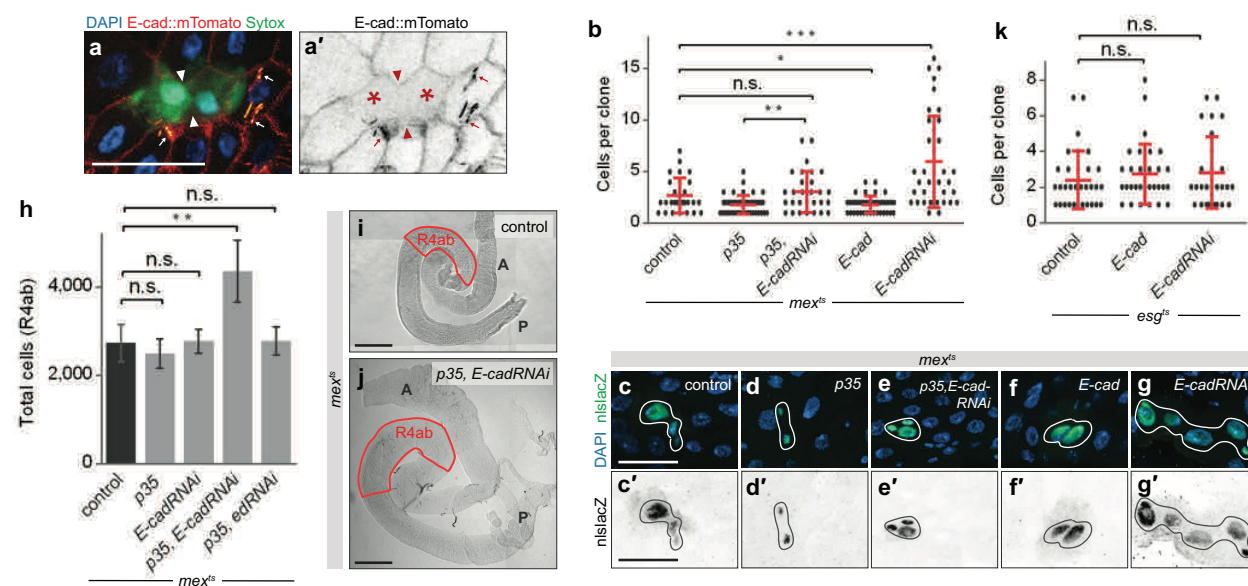**Fig. 2. Homeostatic size control requires *E-cad* on enterocytes, but not on stem cells.**

**a**, Dying enterocytes lose junctional *E-cad*. Endogenous *E-cad* tagged with mTomato (red hot LUT) localizes to the lateral membranes of healthy enterocytes but not dying, Sytox<sup>+</sup> enterocytes (green; asterisks in **a'**). *E-cad* loss is most pronounced where two dying enterocytes are juxtaposed (arrowheads). In these live images, trachea exhibit bright, yellow-orange autofluorescence (arrows). Representative images are shown from two independent experiments; N=4 midguts per experiment, analyzed 6 days post-eclosion. Scale bar, 25  $\mu$ m. **b-g**, Enterocyte *E-cad* is necessary and sufficient to repress stem cell divisions. **b**, Clone size analysis in the R4ab compartment using schema/timing in Fig. 1f. Stem cell clones are larger in *mex<sup>ts</sup> > p35, E-cadRNAi* midguts compared to *mex<sup>ts</sup> > p35* alone (Mann-Whitney test,  $p=0.0034$ ). Clones are also larger in *mex<sup>ts</sup> > E-cadRNAi* midguts compared to control ( $p=0.0004$ ). Clones are smaller in *mex<sup>ts</sup> > E-cad* compared to control ( $p=0.04$ ). **c-g**, Images show average-sized clones. Scale bars, 25  $\mu$ m. **h**, Enterocyte *E-cad* is necessary to maintain constant cell number during apoptotic inhibition. Total cell number is normal in *mex<sup>ts</sup> > p35* and *mex<sup>ts</sup> > E-cadRNAi* midguts but increases by ~70% in *mex<sup>ts</sup> > p35, E-cadRNAi* midguts (unpaired t-test,  $p=0.007$ ) after 4 days. This increase is unlikely caused by non-specific loss of cell-cell adhesion because total cell number remains normal in *mex<sup>ts</sup> > p35, echinoid(ed)RNAi* midguts. N=4 midguts per genotype; means  $\pm$  S.D shown. **i-j**, Enterocyte *E-cad* is necessary to maintain constant organ size during apoptotic inhibition. Organ

size is larger in *mex<sup>ts</sup>>p35, EcadRNAi* midguts compared to controls. A, anterior; P posterior. Scale bars, 200  $\mu$ m. See also Extended Data Fig. 3a. **k**, Stem cell/enteroblast *E-cad* does not control stem cell divisions. Clone size analysis in R4ab as in Fig. 1f, except that *esgGAL4* was used to manipulate *E-cad* in stem and enteroblast cells. Stem cell clones are comparably sized in *esg<sup>ts</sup>* control midguts, *esg<sup>ts</sup>>E-cad* midguts, and *esg<sup>ts</sup>>E-cadRNAi* midguts (Mann-Whitney test,  $p>0.05$ ). In **b** and **k**, data are pooled from 4-5 midguts per genotype. Values are means  $\pm$  S.D. Each graph comprises data from three representative experiments.

Figure 3

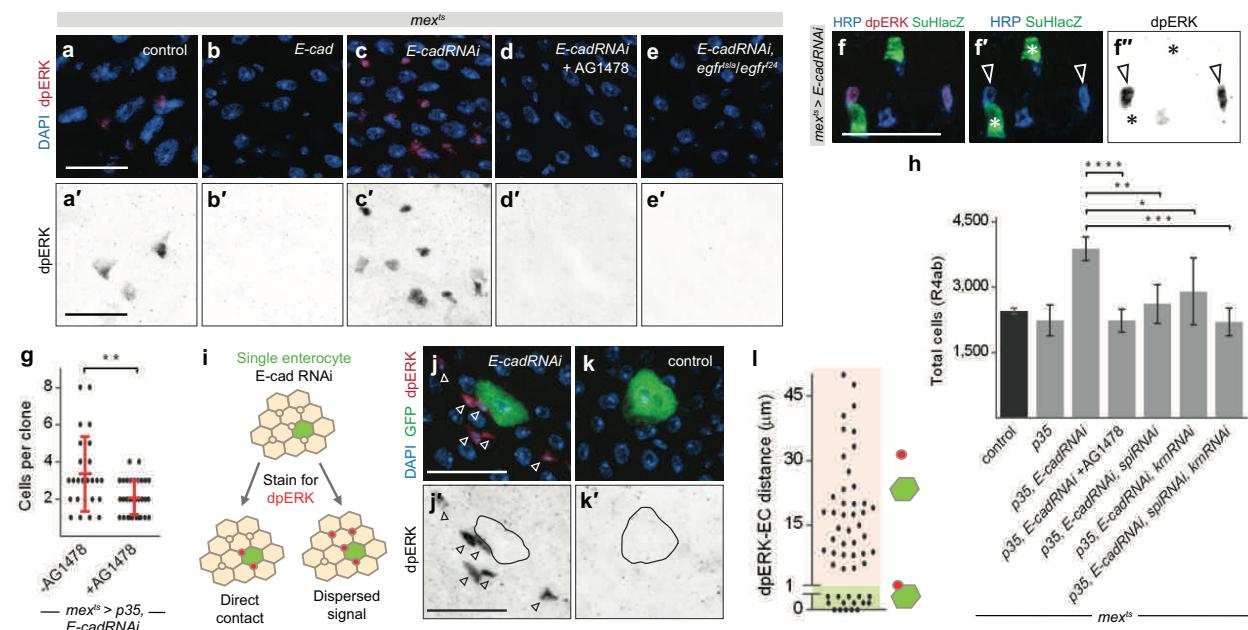

**Fig. 3. Enterocyte E-cad inhibits stem cell EGFR via a dispersed signal for homeostatic size control.**

**a-f**, Enterocyte E-cad inhibits stem cell EGFR signaling. **a-c**, Immunostaining for diphosphorylated ERK (dpERK). dpERK<sup>+</sup> cells are sparse in control midguts, absent in *mex<sup>ts</sup> > E-cad* midguts, and abundant in *mex<sup>ts</sup> > E-cadRNAi* midguts. **d-e**, dpERK signal is eliminated following EGFR inhibition by oral administration of AG1478 or by temperature-induced inactivation of an *egfr<sup>tsla</sup> / egfr<sup>f24</sup>* heteroallele. **f**, dpERK staining is limited to stem cells (HRP<sup>+</sup>, Su(H)lacZ<sup>-</sup>; arrowheads in **f'** and **f''**) and does not mark enteroblasts (HRP<sup>+</sup>, Su(H)lacZ<sup>+</sup>; asterisks in **f'** and **f''**), even in *mex<sup>ts</sup> > E-cadRNAi* midguts. Representative images are shown from two independent experiments; N=4 midguts per genotype in each experiment, analyzed after 2 days of transgene expression. See also Extended Data Fig. 3b. **g**, EGFR activation is necessary for *E-cad*-depleted enterocytes to accelerate stem cell divisions. Clone size analysis in R4ab using schema in Fig 1f. Stem cell clones in *mex<sup>ts</sup> > p35, E-cadRNAi* midguts are smaller when EGFR is inhibited by AG1478. Data pooled from 4-5 midguts per genotype. Mann-Whitney test,  $p=0.008$ . Values are means  $\pm$  S.D. **h**, Organ hyperplasia requires EGFR and the EGF ligands *spitz* (*spi*) and *keren* (*krn*). AG1478 treatment restores total cell numbers of *mex<sup>ts</sup> > p35, E-cadRNAi* midguts to the range of control and *mex<sup>ts</sup> > p35* midguts (unpaired t-test:  $p<0.0001$ ). RNAi of either *spi* or *krn* in

enterocytes reduces total cell numbers, and double RNAi of *spi* and *krr* restores total cell numbers to the normal range ( $p=0.0026$ ,  $0.046$ , and  $0.0002$  respectively).  $N=4$  midguts per genotype, analyzed 4 days post-induction. Values are means  $\pm$  S.D. See also Extended Data Fig. 3a. **i-l**, EGFR activation involves a dispersed signal. Single enterocytes that co-express *E-cadRNAi* and GFP were generated using MARCM (see Methods). **i**, If EGFR activation involves direct E-cad-EGFR binding, then dpERK<sup>+</sup> cells (red) will typically contact an *E-cadRNAi* enterocyte (green). If activation involves a dispersed signal, then dpERK<sup>+</sup> cells will be close to, but not necessarily contact, an *E-cadRNAi* enterocyte. **j-k**, dpERK<sup>+</sup> cells are enriched in the vicinity of a GFP<sup>+</sup>, *E-cadRNAi* enterocyte, but often do not contact. dpERK<sup>+</sup> cells are rare in the vicinity of GFP<sup>+</sup> control enterocytes. **l**, Spatial zone of EGFR activation. Each point is the measured distance between one dpERK<sup>+</sup> cell and edge of the nearest *E-cadRNAi* enterocyte. dpERK<sup>+</sup> cells frequently localize 0-25  $\mu\text{m}$  ( $\sim 1-2$  enterocyte diameters) away and can localize up to 50  $\mu\text{m}$  away.  $N=4$  midguts, analyzed 5 days after clone induction. One of three representative experiments is shown in each graph. Representative images are shown in all panels. All scale bars are 25  $\mu\text{m}$ .

Figure 4

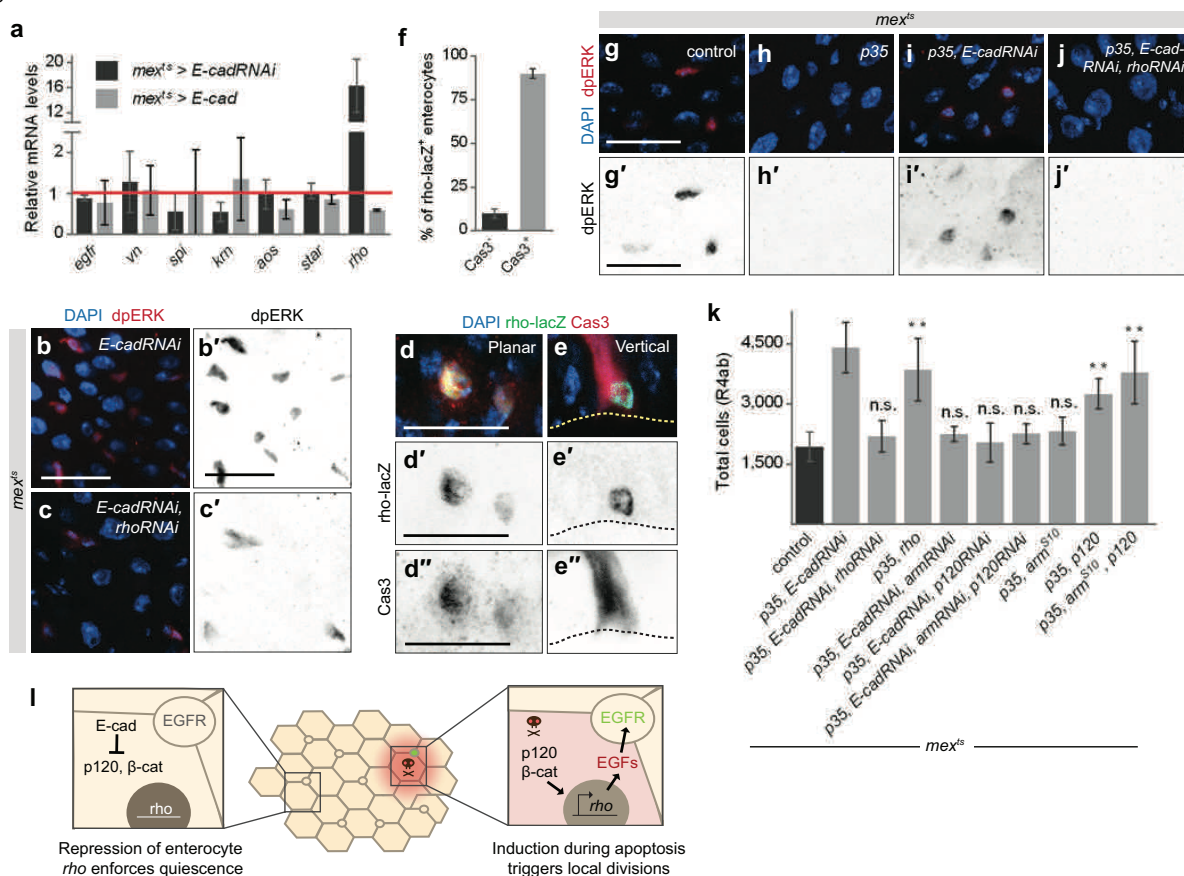

**Fig. 4. Enterocyte apoptosis activates stem cell division by disrupting E-cad-controlled inhibition of rhomboid.**

**a**, Enterocyte *E-cad* specifically inhibits expression of the obligate EGF protease *rhomboid* (*rho*). Levels of the indicated mRNAs were measured by qPCR of *mex*<sup>ts</sup> control (red line), *mex*<sup>ts</sup> > *E-cadRNAi* (black bars), or *mex*<sup>ts</sup> > *E-cad* midguts (gray bars) after 4 days of induction. Relative to control, *rho* mRNAs increase by 15.5-fold upon *E-cad* depletion and decrease by 0.4-fold upon *E-cad* overexpression. mRNAs are not significantly altered for other components of EGF signaling: *egfr*; the EGF ligands *vein* (*vn*), *spitz* (*spi*), and *keren* (*krm*); or the post-translational EGF regulators *argos* (*aos*) and *star*. Values are means  $\pm$  S.D. from 3 independent experiments. **b-c**, *E-cad*-depleted enterocytes require *rho* to hyperactivate stem cell EGFR. dpERK<sup>+</sup> cells are abundant in *mex*<sup>ts</sup> > *E-cadRNAi* midguts but are substantially reduced in *mex*<sup>ts</sup> > *E-cadRNAi*, *rhoRNAi* midguts. Representative images are shown from two independent experiments; N=4 midguts per genotype in each experiment, analyzed after 2 days of transgene

expression. See also Extended Data Fig. 3b. **d-f**, Expression of *rho* is activated in enterocytes during physiological apoptosis. Under steady-state conditions, the *rho-lacZ* reporter (green) is typically expressed in apoptotic enterocytes (red, cleaved caspase-3 staining) and rarely in non-apoptotic enterocytes. Planar (**d**) and vertical (**e**) views of two different fields are shown. In **e**, dotted line marks the basal epithelium. **f**, Quantification. Nearly all enterocytes that express *rho-lacZ* (90%) are also apoptotic. Values are means  $\pm$  S.D from 3 independent experiments. N=3-4 midguts per experiment, analyzed 6 days post-eclosion; n=188 enterocytes total. **g-j**, Apoptosis-blocked enterocytes inhibit stem cell ERK activation via *E-cad* and *rho*. Compared to their normal frequency, dpERK<sup>+</sup> cells are strongly reduced when enterocyte apoptosis is blocked (*mex<sup>ts</sup>>p35*), are restored when *E-cad* is additionally depleted (*mex<sup>ts</sup>>p35, E-cadRNAi*), and are strongly reduced again when both *E-cad* and *rho* are depleted (*mex<sup>ts</sup>>p35, E-cadRNAi, rhoRNAi*). Representative images are shown from two independent experiments; N=4 midguts per genotype in each experiment, analyzed after 2 days of transgene expression. See also Extended Data Fig. 3b. **k**, Activation of *rho* by p120-catenin and Armadillo drives organ hyperplasia. In apoptosis-inhibited midguts, loss of *E-cad* (*mex<sup>ts</sup>>p35, E-cadRNAi*) causes total cell number to increase by 128% compared to control, producing organ hyperplasia. Additional loss of *rho* (*mex<sup>ts</sup>>p35, E-cadRNAi, rhoRNAi*) restores normal cell number and prevents hyperplasia. On the other hand, overexpression of *rho* alone (*mex<sup>ts</sup>>p35, rho*) causes a 100% increase in total cells ( $p=0.0017$ ), resulting in hyperplasia without loss of *E-cad*. Thus, *rho* is necessary and sufficient for hyperplasia. Activation of *rho* is mediated by the E-cad-associated transcription factors p120-catenin (p120) and Armadillo (Arm) (Extended Data Fig. 7). Loss of either *p120* or *arm*, or both *p120* and *arm* (*mex<sup>ts</sup>>p35, E-cadRNAi, p120RNAi* and/or *armRNAi*), restores normal cell number and prevents hyperplasia. Overexpression of *p120*, but not constitutively active *arm* (*arm<sup>S10</sup>*), causes hyperplasia (69% increase in total cells;  $p=0.0011$ ); overexpression of both *p120* and *arm<sup>S10</sup>* (*mex<sup>ts</sup>>p35, p120, arm<sup>S10</sup>*) slightly exacerbates hyperplasia compared to *p120* alone (96% increase in total cells;  $p=0.0021$ ). Thus, *p120* and *arm* are necessary and sufficient for hyperplasia. Values are means  $\pm$  S.D from one of three representative experiments.  $p$  values (unpaired t-test) relative to control. N=4 midguts per genotype, analyzed after 4 days of transgene expression. See also Extended Data Fig. 3a. **l**, Model for homeostatic coupling of enterocyte apoptosis and stem cell division. In the absence of apoptosis (left), stem cells are quiescent because enterocyte E-cad

represses p120- and Arm-dependent expression of *rho* to preclude activation of stem cell EGFR. Apoptotic enterocytes (right) disrupt this inhibitory feedback to trigger localized EGFR activation and replacement divisions of stem cells. Representative images shown in all panels. All scale bars are 25  $\mu\text{m}$ .



**EXTENDED DATA FIGURES 1-8****Extended Data Figure 1**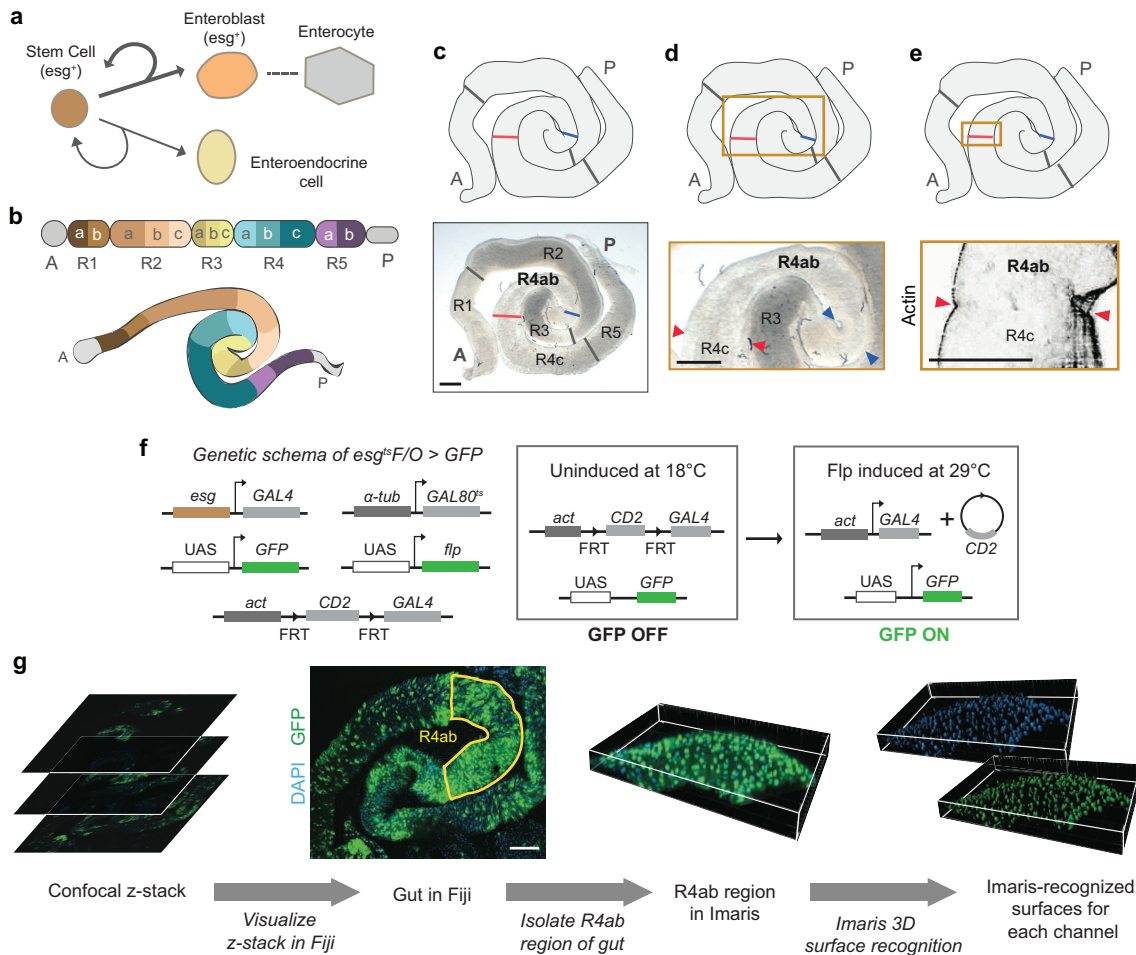**Extended Data Fig. 1. Midgut lineage and morphology, *esg*<sup>F/O</sup> labeling system, and workflow for semi-automated cell counting.**

**a**, Lineage of the adult *Drosophila* midgut <sup>9,84,89</sup>. In general, stem cells are the only cells capable of division. Asymmetric stem cell divisions typically produce absorptive enterocytes; less frequently, they produce secretory enteroendocrine cells. Enterocytes arise through direct maturation of transient, post-mitotic intermediates called enteroblasts. Both stem and enteroblast cells express the Snail-family transcription factor *escargot* (*esg*). **b**, Compartments of the female adult midgut <sup>14,15,81</sup>. R4ab was used for all experiments in this study. Schematic adapted from <sup>14,81</sup>. **c-e**, Identification of R4ab through morphological landmarks. As defined in <sup>14</sup>, R4ab is bounded by the apex of the midgut tube's most distal 180° turn (blue arrowheads) and by the first prominent muscle constriction distal to this 180° turn (red arrowheads). **e**, The R4ab distal muscle constriction is particularly apparent in confocal optical sections <sup>14</sup>. Visceral muscle stained with phalloidin. Midguts in panels **c-d** and **e** are two different samples. **f**, Genetic schema of the *esg*<sup>F/O</sup> system <sup>13</sup>. Stem and enteroblast cells are induced to express heritable GFP by temperature shift from 18°C to 29°C. The temperature shift inactivates GAL80<sup>ts</sup>, which allows *esg*GAL4 to drive

expression of both *UAS-GFP* and *UAS-flp* in stem and enteroblast cells. In these cells, flp recombinase renders GFP expression permanent and heritable by excising a CD2 ‘flp-out’ cassette to generate a functional *actGAL4*; once generated, *actGAL4* drives expression of *UAS-GFP* (and *UAS-flp*) irrespective of cell type. Thus, after temperature shift, all mature cells that arise from undifferentiated cells will express *GFP*. **g**, Pipeline for semi-automated, comprehensive cell counts of 3D, reconstructed midgut regions. (1) Confocal microscope z-stacks capturing the entire depth of the organ are visualized in Fiji. (2) The R4ab region of the midgut (yellow outline)<sup>14,15</sup> is digitally isolated and exported to Imaris. (For illustrative purposes, only the top half of the gut tube is shown.) Note that different midgut regions have different rates of turnover: R4ab undergoes complete turnover between adult days 4-8 (at 29°C). However, other regions undergo slower turnover, as shown by large unlabeled regions outside of R4ab. The slower turnover of these other regions is consistent with the 7-21 day time frame of whole-organ turnover reported by others<sup>9,83-85</sup>. See Methods for further discussion. (3) To quantify total cells (DAPI<sup>+</sup>), nuclei are mapped to surface objects using Imaris (Figs. 1e, 1k, 2h, 3h, 4k; Extended Data Fig. 8a). To quantify newly-added cells in the *esg<sup>F/O</sup>* system (Fig. 1e), GFP<sup>+</sup> nuclei are recognized in Imaris by co-localization of GFP and DAPI channels, and subsequently mapped to surface objects. Scale bars are 100µm.

## Extended Data Figure 2

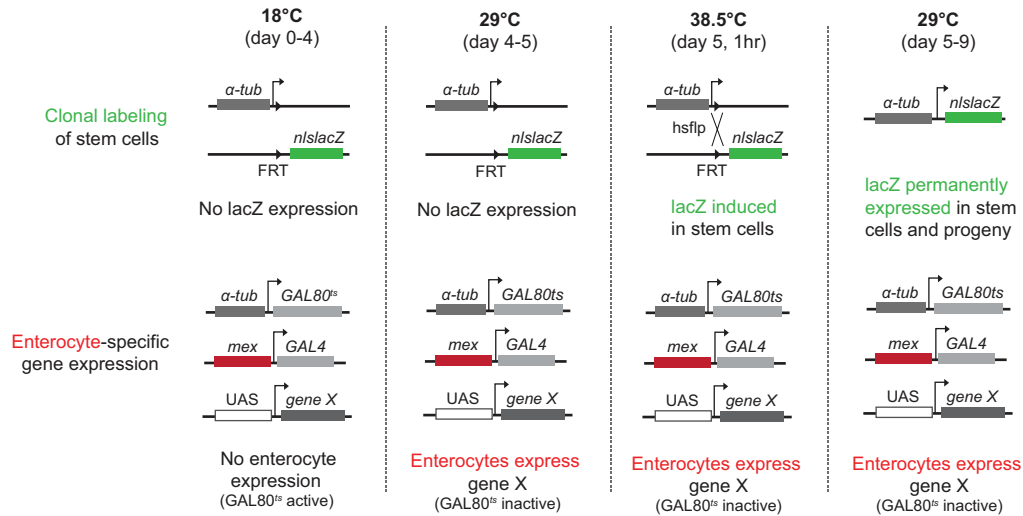

### Extended Data Fig. 2 Genetic schema of system to simultaneously manipulate enterocyte expression and trace stem cell divisions.

Detailed explanation of the genetic system in Fig. 1f. Animals are raised at 18°C; at this temperature, *GAL80<sup>ts</sup>* represses *mex*-driven *GAL4* in enterocytes, and *lacZ* labeling of stem cells is not induced. When animals are temperature-shifted to 29°C, consequent inactivation of *GAL80<sup>ts</sup>* allows *mex*-driven *GAL4* to express genes of interest (UAS-*gene X*) specifically in enterocytes. After 1 day of UAS gene expression, animals are shifted to 38.5°C for one hour to induce ubiquitous expression of *flp* recombinase, which is under control of a heat-shock promoter (*hs-flp*). *Flp* catalyzes trans-recombination of the two FRTs to place the *α-tubulin* promoter upstream of the promoter-less *nls:lacZ* cassette and, consequently, turn on permanent *nls:lacZ* expression. After heat shock, animals are returned to 29°C to maintain UAS-trangene expression. Midguts are harvested for clonal analysis 4 days after the 38.5°C heat shock. This 4-day chase, combined with exclusion of single, labeled enterocytes from clone counts, ensures that counts comprise exclusively stem cell clones and that any non-stem (transient) clones are eliminated (see Methods).

## Extended Data Figure 3

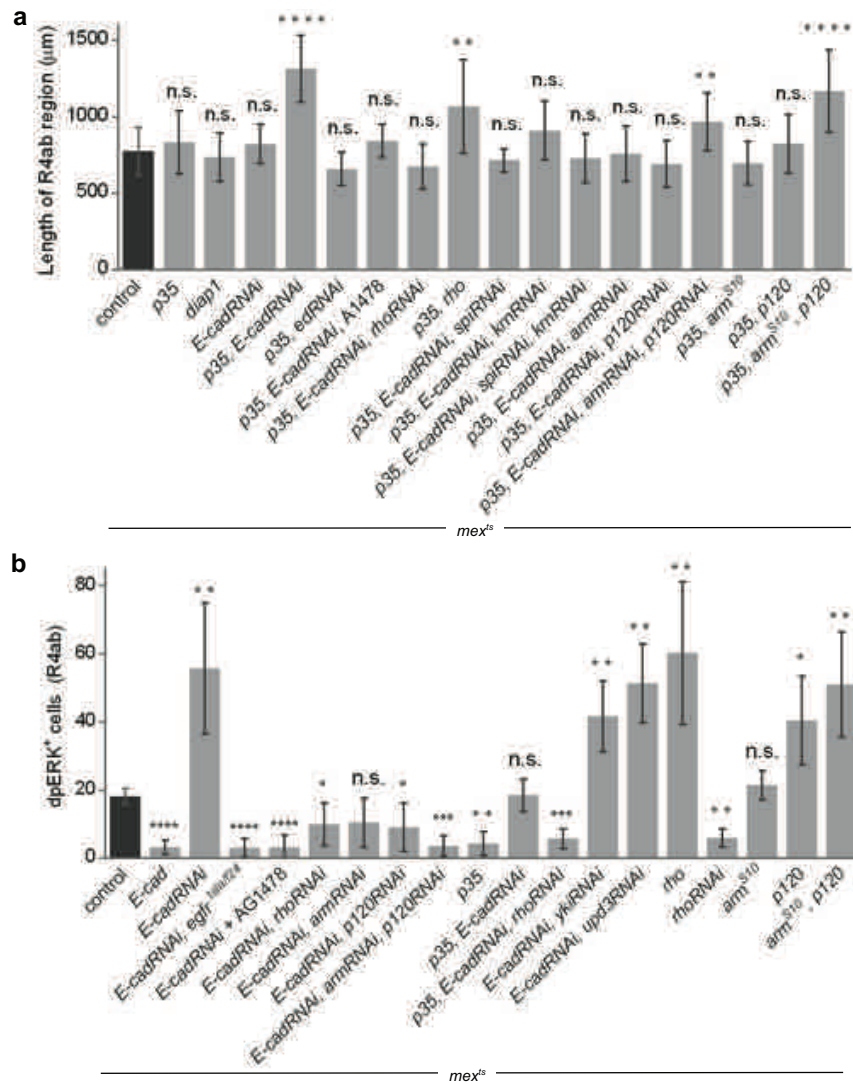

### Extended Data Fig. 3. Quantifications of organ size and EGFR activation in genetically manipulated midguts.

**a**, Lengths of the R4ab compartment. For 4 of 17 conditions, R4ab are significantly longer than control: *mex<sup>ts</sup> > p35, E-cadRNAi* (unpaired t-test:  $p < 0.0001$ ), *p35, rho* ( $p = 0.0052$ ), *p35, E-cadRNAi, armRNAi, p120RNAi* ( $p = 0.0029$ ), and *p35, p120, arm<sup>S10</sup>* ( $p < 0.0001$ ).  $N = 10-12$  midguts per genotype, analyzed after 4 days of UAS-transgene expression. Values are means  $\pm$  S.D.

**b**, Quantifications of dpERK<sup>+</sup> cells in the R4ab compartment. For 15 of 18 conditions, numbers of dpERK<sup>+</sup> cells are significantly different from control: *mex<sup>ts</sup> > E-cad* (unpaired t-test:  $p < 0.0001$ ), *E-cadRNAi* ( $p = 0.0081$ ), *E-cadRNAi, egfr<sup>ts/la/f24</sup>* ( $p < 0.0001$ ), *E-cadRNAi + AG1478* ( $p < 0.0001$ ), *E-cadRNAi, rhoRNAi* ( $p = 0.04$ ), *E-cadRNAi, p120RNAi* ( $p = 0.04$ ), *E-cadRNAi, armRNAi, p120RNAi* ( $p = 0.007$ ), *p35* ( $p = 0.0013$ ), *p35, E-cadRNAi, rhoRNAi* ( $p = 0.0005$ ), *E-cadRNAi, ykiRNAi* ( $p = 0.006$ ), *E-cadRNAi, upd3RNAi* ( $p = 0.002$ ), *rho* ( $p = 0.007$ ), *rhoRNAi* ( $p = 0.001$ ), *p120* ( $p = 0.015$ ), *arm<sup>S10</sup>, p120* ( $p = 0.005$ ).  $N = 4$  midguts per genotype, analyzed after 2 days of UAS-transgene expression. Values are means  $\pm$  S.D.

## Extended Data Figure 4

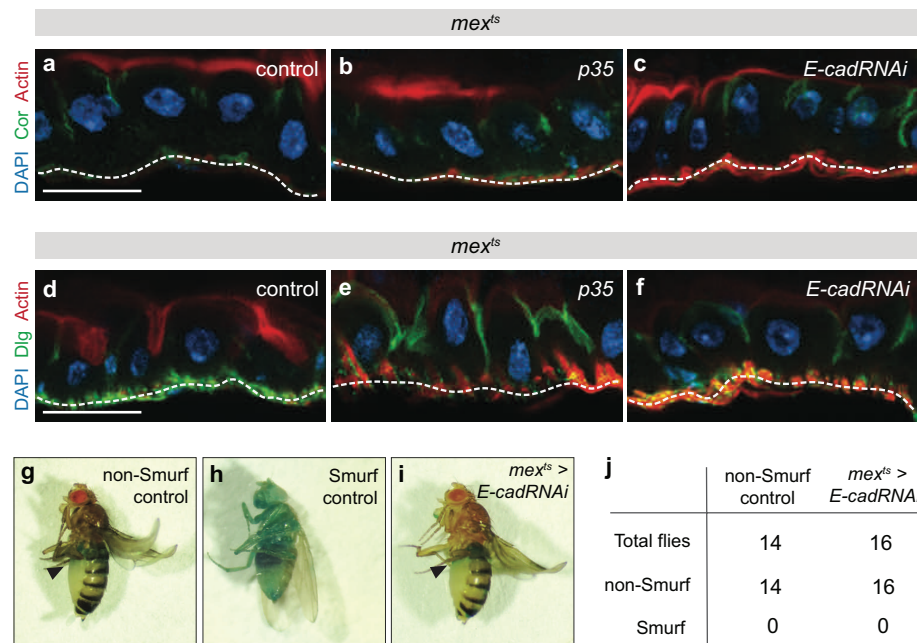**Extended Data Fig. 4. Analysis of epithelial architecture, polarity, and barrier function.**

**a-f**, Apoptotic inhibition or *E-cad* depletion in enterocytes does not disrupt epithelial architecture or apical-basal polarity. Images show vertical sections through the midgut epithelium after 4 days of either *mex<sup>ts</sup>* > *p35* or *mex<sup>ts</sup>* > *E-cadRNAi* expression. Enterocytes remain as a coherent monolayer. Apical-basal polarity is intact, as revealed by immunolocalization of apical, actin-rich microvilli (**a-f**, red) and of apico-lateral septate junction proteins Coracle (**a-c**, green) and Discs-large (**d-f**, green). At the basal surface of the epithelium (white dotted lines), midgut visceral muscle cells stain brightly for actin and Discs-large. Actin stained with SiR-Actin. Scale bars are 25 $\mu$ m. **g-j**, Depletion of *E-cad* in enterocytes does not compromise the intestinal barrier. To test the intestinal barrier, animals were subjected to Smurf assays in which a blue, non-absorbable food dye is administered by feeding<sup>87</sup>. The dye remains within the midgut when the barrier is intact (**g**, non-Smurf) but leaks into the body cavity when the barrier is compromised, such as after consumption of 1% SDS (**h**, Smurf). After 10 days of *mex<sup>ts</sup>* > *E-cadRNAi* expression, midguts still retain the blue dye; no Smurf phenotypes are observed (**i-j**).

## Extended Data Figure 5

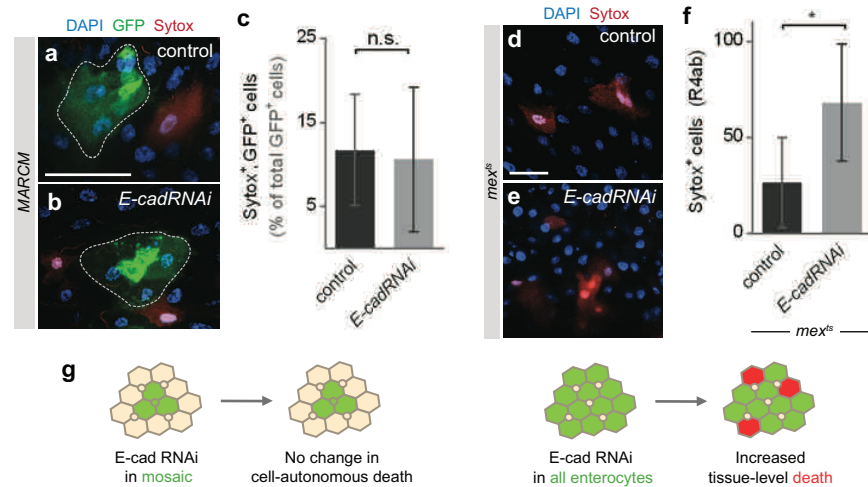

### Extended Data Fig. 5. Depletion of *E-cad* has distinct cell-autonomous and tissue-level effects on cell death.

The data in Fig. 2h show that midguts accumulate excess cells when *E-cad* is depleted from apoptosis-inhibited enterocytes but not apoptosis-competent enterocytes. To shed light on this difference, we examined whether *E-cad* depletion itself promotes cell death. Two approaches, mosaic knockdown and pan-enterocyte knockdown, were used to distinguish direct, cell-autonomous effects from indirect, tissue-level effects. **a-c**, Mosaic knockdown of *E-cad* does not promote cell-autonomous death. Mosaic midguts are generated by using MARCM<sup>59</sup> to induce sparse, multicellular, GFP-marked clones in a background of unmarked, genetically unperturbed cells. **a-b**, Dotted outlines show representative control and *E-cadRNAi* clones (green). Sytox (red) identifies dying cells. **c**, Percentage of GFP<sup>+</sup> cells that are also Sytox<sup>+</sup>. Dying cells occur with near-equal frequency within control and *E-cadRNAi* clones. Unpaired t-test,  $p > 0.05$ .  $N = 5$  midguts per genotype, analyzed 9 days after clone induction;  $n = 873$  cells in control clones and 698 cells in *E-cadRNAi* clones. Values are means  $\pm$  S.D. **d-f**, Pan-enterocyte knockdown of *E-cad* promotes cell death, likely through a non-autonomous effect. **d-e**, Representative images of *mex<sup>ts</sup>* control and *mex<sup>ts</sup> > E-cadRNAi* epithelia. Sytox (red) identifies dying cells. **f**, Quantification of Sytox<sup>+</sup> cells in the R4ab compartment. The number of dying cells increases  $\sim 2.5$ x in *E-cadRNAi* midguts compared to control (unpaired t-test,  $p = 0.03$ ).  $N = 5$  midguts per genotype, analyzed after 3 days of transgene induction. Values are means  $\pm$  S.D. Scale bars are 25  $\mu$ m. **g**, Summary. The unaltered frequency of dying cells in *E-cadRNAi* mosaic clones indicates that loss of *E-cad* does not cause cell-autonomous death. This result suggests that elevated death in *mex<sup>ts</sup> > E-cadRNAi* guts is a non-autonomous, tissue-level effect, possibly due to excess divisions (Fig 2b) and consequent crowding<sup>90</sup>. These findings may explain why *p35, E-cadRNAi* guts accumulate excess cells whereas *E-cadRNAi* guts retain a normal number of cells (Fig. 2h).

## Extended Data Figure 6

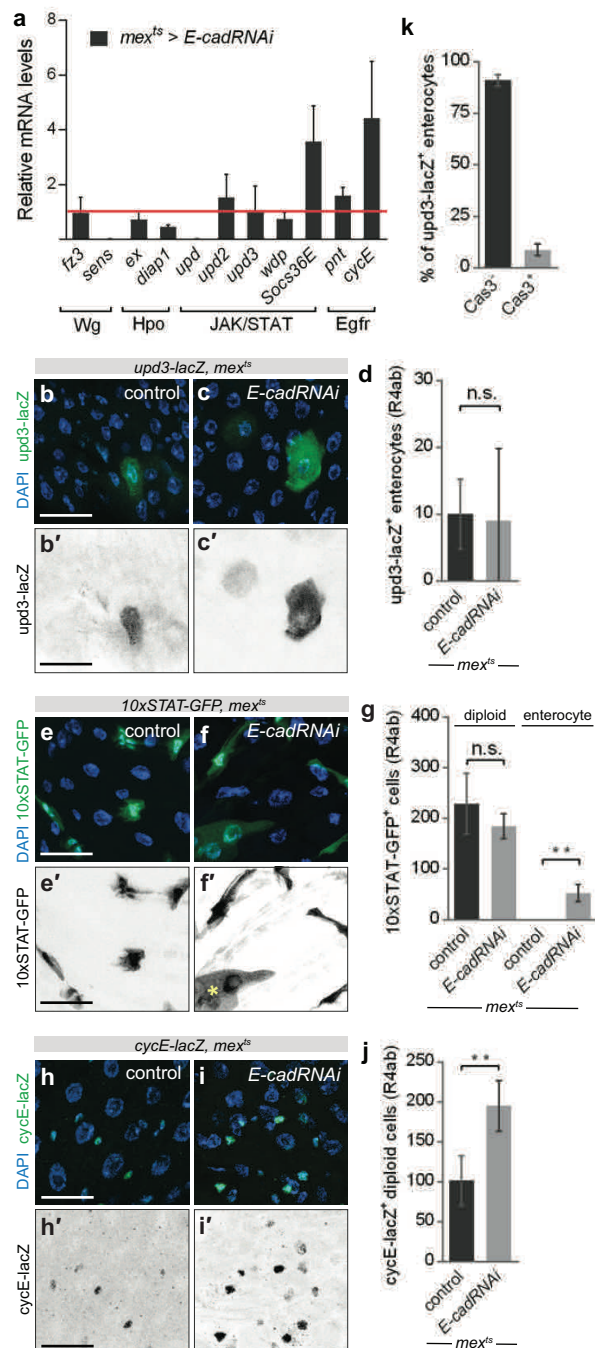

### Extended Data Fig. 6. Loss of enterocyte *E-cad* activates EGFR, but not Wg, Hpo, or Upd/JAK/STAT.

**a**, Effect of enterocyte *E-cad* depletion on target mRNAs of known midgut regulatory pathways. mRNAs were measured by qPCR of  $mex^{ts}$  control or  $mex^{ts} > E-cadRNAi$  midguts. Relative to control (red line), mRNAs are unchanged for: the Wg targets *frizzled-3* (*fz3*) and *senseless* (*sens*)<sup>91,92</sup>, the Hpo/Yki targets *expanded* (*ex*) and *diap1*<sup>88,93</sup>, the injury-associated cytokines *upd* and *upd3*<sup>46-49</sup>, and the JAK/STAT target *windpipe* (*wdp*)<sup>94</sup>. The other JAK/STAT target, *Socs36E*, is elevated, likely reflecting its occasional activation in enterocytes (panel f). By comparison, the EGFR target *pointed* (*pnt*)<sup>52</sup> is slightly increased, and the EGFR target *cyclinE*

(*cycE*)<sup>53</sup> is substantially increased. Values are means  $\pm$  S.D. from 3 independent experiments. Midguts analyzed 4 days post-induction. **b-d**, The number of *upd3-lacZ*<sup>+</sup> enterocytes in the R4ab compartment is unchanged by enterocyte *E-cad* depletion (unpaired t-test:  $p>0.05$ ). **e-g**, The number of *10XSTAT-GFP*<sup>+</sup> diploid cells in R4ab is unchanged by enterocyte *E-cad* depletion (unpaired t-test:  $p>0.05$ ). Occasional activation of *10XSTAT-GFP*<sup>+</sup> occurs in *E-cad*-depleted enterocytes (asterisk in **f**; unpaired t-test  $p=0.003$ ), consistent with elevated *Socs36E* (panel **a**). **h-j**, The number of *cycE*<sup>+</sup> diploid cells in R4ab increases by 92% following enterocyte *E-cad* depletion (unpaired t-test:  $p=0.005$ ). In panels **d**, **g**, and **j**, values are means  $\pm$  S.D of 4 midguts, analyzed 2 days post-induction. **k**, Expression of *upd3* is not associated with physiological apoptosis. Most enterocytes (~91%) that express *upd3-lacZ* are non-apoptotic, as assessed by staining for cleaved Caspase-3. Values are means  $\pm$  S.D of 4 midguts, analyzed 6 days post-eclosion. Representative images shown in all panels. All scale bars are 25  $\mu$ m.



## Extended Data Figure 7

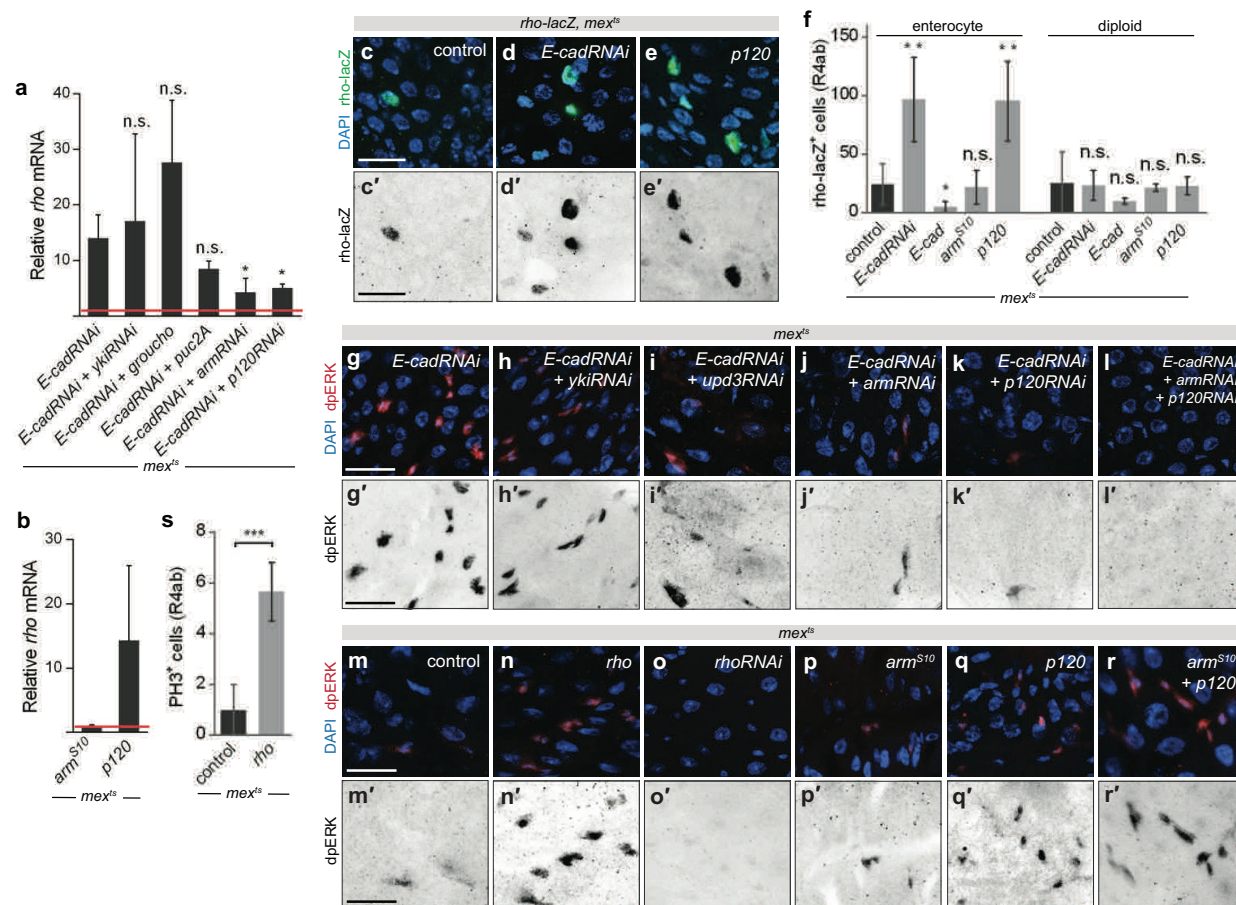

### Extended Data Fig. 7. Two E-cad-associated transcription factors, Armadillo and p120-catenin, activate *rho* following loss of *E-cad* in enterocytes.

**a**, Enterocyte *armadillo* (*arm*) and *p120-catenin* (*p120*), but not *yorkie* (*yki*) or *groucho*, are necessary for activation of *rho* upon depletion of enterocyte *E-cad*. *rho* mRNAs were measured by qPCR of either *mex<sup>ts</sup>* control (red line) or *mex<sup>ts</sup>* >*E-cadRNAi* midguts, the latter with additional manipulation of candidate *rho* regulators as indicated. Five candidates were examined: Yki, a transcriptional co-activator in the Hpo pathway; Groucho, a co-repressor known to target *rho* in some tissues; JNK, which can augment EGF signaling; and Arm and p120, co-activators that are inhibited by sequestration at E-cad adherens junctions. Neither *yki* depletion nor *groucho* overexpression prevents *rho* activation in *E-cad* knockdown midguts. Overexpression of the JNK inhibitor *puckered* (*puc2A*) partially reduces *rho* activation, although with unclear significance (unpaired t-test,  $p=0.22$ ). By contrast, knockdown of either *arm* or *p120* significantly reduces *rho* activation ( $p=0.04$  and  $0.03$ , respectively). **b**, Overexpression of *p120*, but not *arm<sup>S10</sup>*, in enterocytes is sufficient to increase *rho* mRNAs relative to control (red line), as measured by qPCR. In **a** and **b**, values are means  $\pm$  S.D. of 3 independent experiments; midguts analyzed 4 days post-induction. **c-e**, Depletion of *E-cad* or overexpression of *p120* induces *rho-lacZ* in enterocytes. **f**, Quantification of *rho-lacZ<sup>+</sup>* cells. The number of *rho-lacZ<sup>+</sup>* enterocytes increases with *E-cad* depletion or *p120* overexpression (unpaired t-test,  $p=0.003$  and  $0.007$  respectively), decreases with

*E-cad* overexpression ( $p=0.04$ ), and is unchanged by overexpression of *arm*<sup>S10</sup>. The number of *rho-lacZ*<sup>+</sup> diploid cells is unchanged. In **c-f**, values are means  $\pm$  S.D of 4 midguts, analyzed 2 days post-induction. **g-l**, Enterocyte *arm* and *p120*, but not *yki* or *upd3*, are necessary for activation of stem cell EGFR following loss of *E-cad*. **g-i**, dpERK<sup>+</sup> cells are similarly abundant upon double enterocyte RNAi of *E-cad* and either *yki* or *upd3* as upon single RNAi of *E-cad* alone. **j-l**, By contrast, dpERK<sup>+</sup> cells are substantially decreased upon double RNAi of *E-cad* and either *arm* or *p120* and virtually disappear upon triple RNAi of *E-cad*, *arm*, and *p120*. **m-o**, Enterocyte *rho* is necessary and sufficient for activation of stem cell EGFR. Overexpression of *rho* in enterocytes increases the abundance of dpERK<sup>+</sup> stem cells relative to control, whereas depletion of *rho* nearly eliminates them. **p-r**, Enterocyte *p120*, but not *arm*, is sufficient to activate stem cell EGFR. Overexpression of *p120*, but not *arm*<sup>S10</sup>, increases the abundance of dpERK<sup>+</sup> stem cells compared to control. Overexpression of both *p120* and *arm*<sup>S10</sup> together resembles *p120* alone. Panels **g-r** represent two independent experiments; N=4 midguts per genotype, analyzed 2 days after transgene expression. See also Extended Data Fig. 3b. **s**, Overexpression of enterocyte *rho* increases the number of mitotic (phospho-histone H3<sup>+</sup>) stem cells (unpaired t-test,  $p=0.0009$ ). N=4 midguts, assessed after 2 days of transgene expression. Representative images shown in all panels. All scale bars are 25  $\mu$ m.

## Extended Data Figure 8

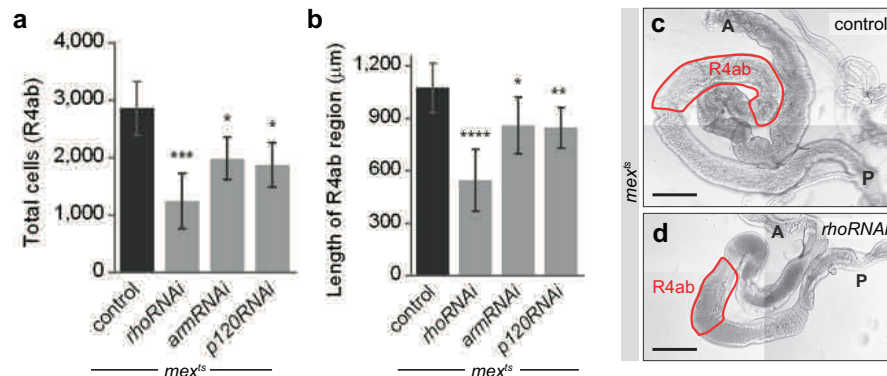Extended Data Fig. 8. Loss of *rho*, *arm*, or *p120* in enterocytes results in organ atrophy.

**a**, Total R4ab cell counts. Depletion of *rho* in enterocytes reduces total cells by 60% compared to control (unpaired t-test,  $p=0.0007$ ). Depletion of either *arm* or *p120* reduces total cells by ~35% ( $p=0.011$  and  $p=0.012$ , respectively). Values are means  $\pm$  S.D from one of three representative experiments.  $N=4$  midguts per genotype, analyzed after 6 days of induction. **b-d**, Depletion of enterocyte *rho*, *arm*, or *p120* reduces organ size. The R4ab compartment is significantly shorter following depletion of enterocyte *rho*, *arm*, or *p120* compared to control (unpaired t-test,  $p<0.0001$ , 0.011, and 0.0001 respectively).  $N=10-12$  midguts per genotype, analyzed after 6 days of induction. Representative images are shown. A, anterior; P posterior. Scale bars: 200 $\mu\text{m}$ .

## Extended Data References (not cited in main text)

79. Oda, H. & Tsukita, S. Nonchordate classic cadherins have a structurally and functionally unique domain that is absent from chordate classic cadherins. *Developmental Biology* **216**, 406–422 (1999).
80. Freeman, M., Kimmel, B. E. & Rubin, G. M. Identifying targets of the rough homeobox gene of *Drosophila*: evidence that rhomboid functions in eye development. *Development* **116**, 335–346 (1992).
81. O'Brien, L. E. Regional specificity in the *Drosophila* midgut: setting boundaries with stem cells. *Cell Stem Cell* **13**, 375–376 (2013).
82. Strand, M. & Micchelli, C. A. Quiescent gastric stem cells maintain the adult *Drosophila* stomach. *Proceedings of the National Academy of Sciences* **108**, 17696–17701 (2011).
83. Cordero, J. B., Stefanatos, R. K., Scopelliti, A., Vidal, M. & Sansom, O. J. Inducible progenitor-derived Wingless regulates adult midgut regeneration in *Drosophila*. *EMBO J* **31**, 3901–3917 (2012).
84. Zeng, X. & Hou, S. X. Enteroendocrine cells are generated from stem cells through a distinct progenitor in the adult *Drosophila* posterior midgut. *Development* **142**, 644–653 (2015).
85. Antonello, Z. A., Reiff, T., Ballesta-Illan, E. & Dominguez, M. Robust intestinal homeo-

- stasis relies on cellular plasticity in enteroblasts mediated by miR-8-Escargot switch. *EMBO J* **34**, 2025–2041 (2015).
86. Takashima, S., Younossi-Hartenstein, A., Ortiz, P. A. & Hartenstein, V. A novel tissue in an established model system: the *Drosophila* pupal midgut. *Dev Genes Evol* **221**, 69–81 (2011).
  87. Rera, M. *et al.* Modulation of longevity and tissue homeostasis by the *Drosophila* PGC-1 homolog. *Cell Metab* **14**, 623–634 (2011).
  88. Shaw, R. L. *et al.* The Hippo pathway regulates intestinal stem cell proliferation during *Drosophila* adult midgut regeneration. *Development* **137**, 4147–4158 (2010).
  89. Biteau, B. & Jasper, H. Slit/Robo signaling regulates cell fate decisions in the intestinal stem cell lineage of *Drosophila*. *Cell Rep* **7**, 1867–1875 (2014).
  90. Eroglu, M. & Derry, W. B. Your neighbours matter – non-autonomous control of apoptosis in development and disease. *Cell Death Differ* **23**, 1110–1118 (2016).
  91. Tian, A., Benchabane, H., Wang, Z. & Ahmed, Y. Regulation of stem cell proliferation and cell fate specification by Wntless/Wnt signaling gradients enriched at adult intestinal compartment boundaries. *PLoS Genetics* **12**, e1005822 (2016).
  92. DasGupta, R., Kaykas, A., Moon, R. T. & Perrimon, N. Functional genomic analysis of the Wnt-wingless signaling pathway. *Science* **308**, 826–833 (2005).
  93. Karpowicz, P., Perez, J. & Perrimon, N. The Hippo tumor suppressor pathway regulates intestinal stem cell regeneration. *Development* **137**, 4135–4145 (2010).
  94. Ren, W. *et al.* Windpipe controls *Drosophila* intestinal homeostasis by regulating JAK/STAT pathway via promoting receptor endocytosis and lysosomal degradation. *PLoS Genetics* **11**, e1005180 (2015).
